# Supplementary material
Source: PubMed Central journal article supplement (PMC2760007)

## 9. NMR Spectra

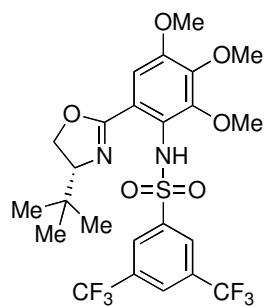

<sup>1</sup>H NMR of (*R*)-**E**  
(500 MHz, CDCl<sub>3</sub>)

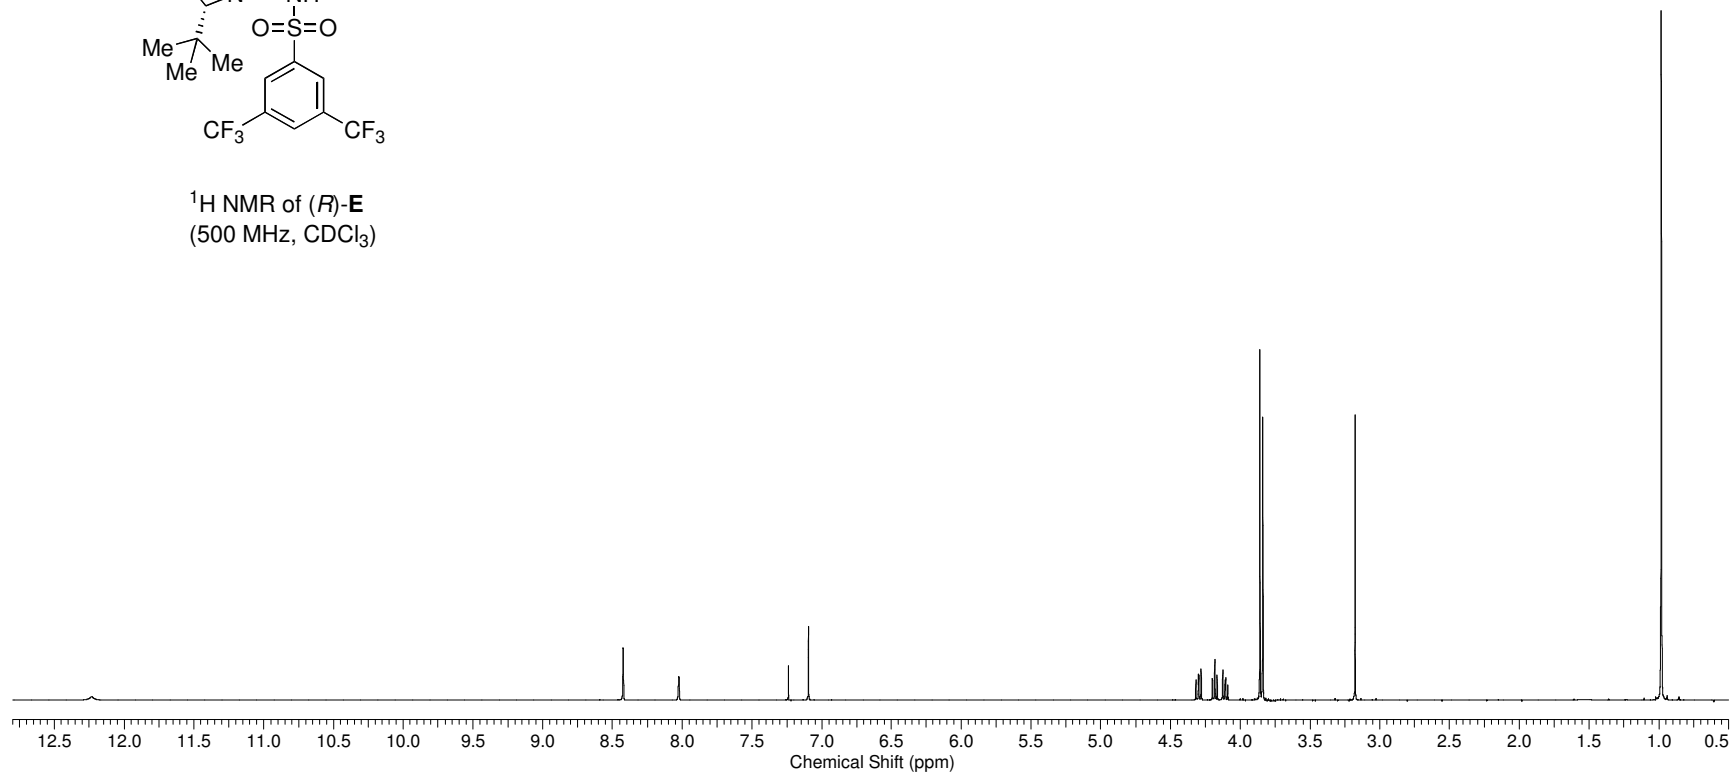

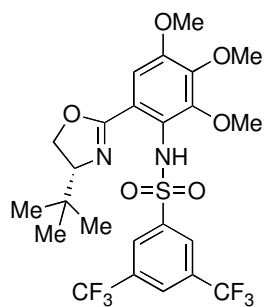

<sup>13</sup>C NMR of (*R*)-E  
(125 MHz, CDCl<sub>3</sub>)

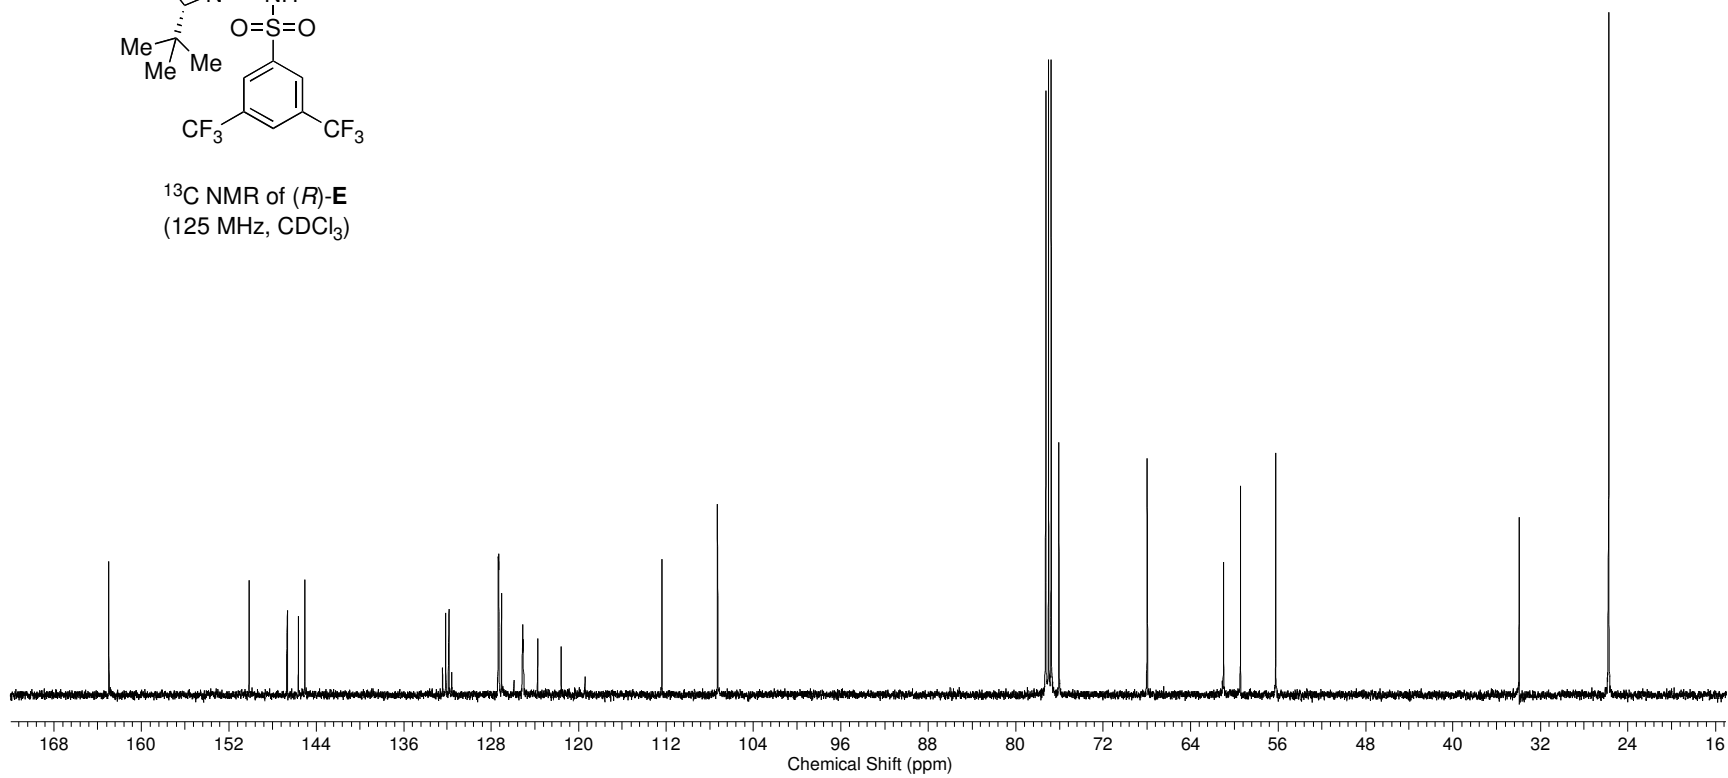

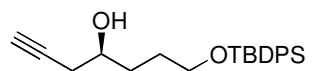

$^1\text{H}$  NMR of **8**  
(500 MHz,  $\text{CDCl}_3$ )

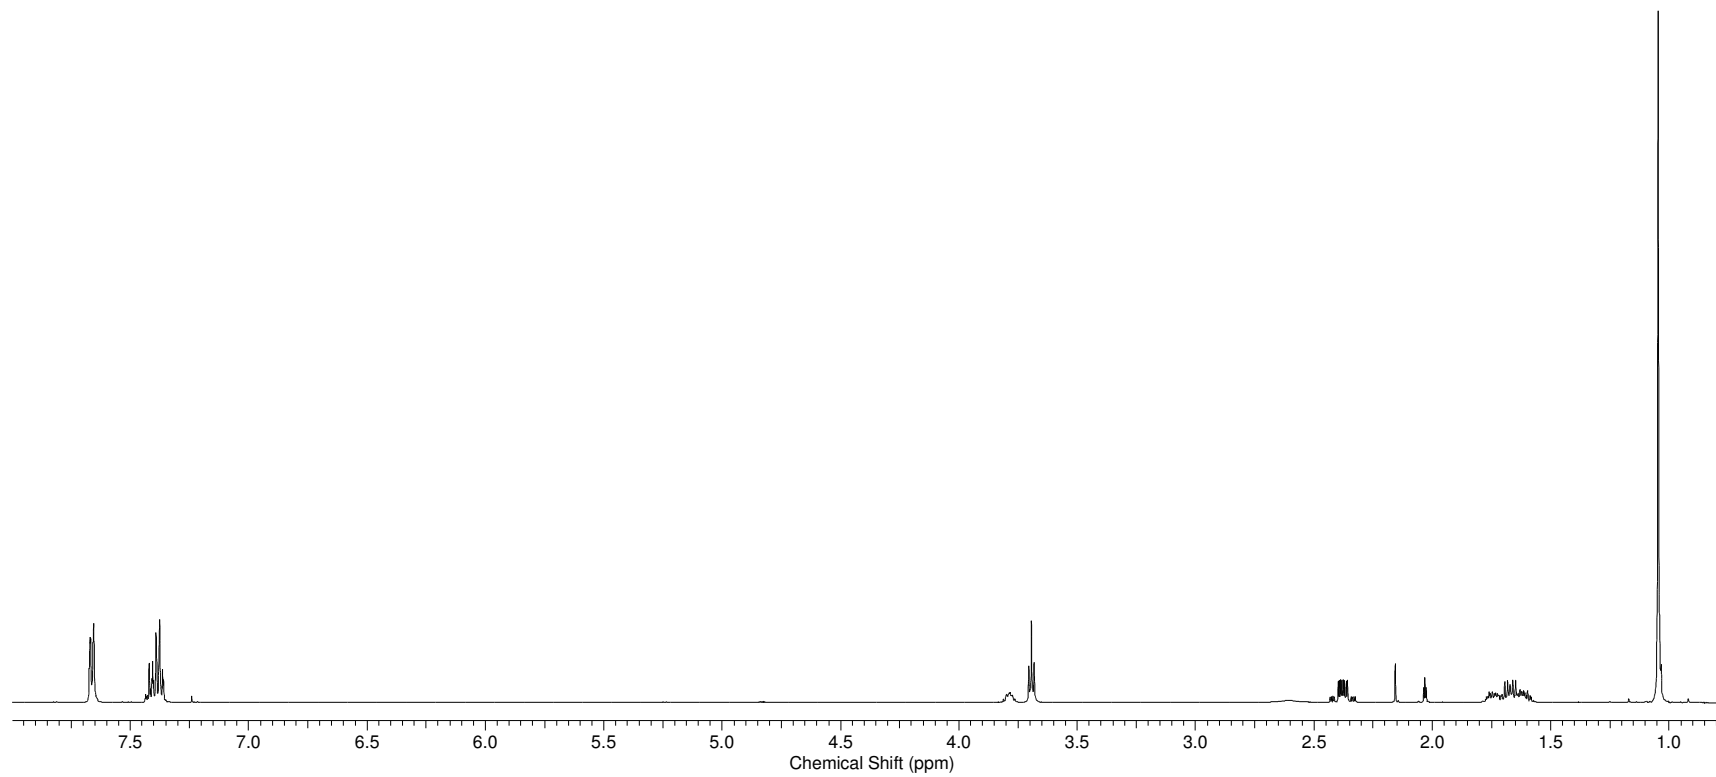

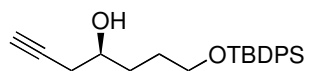

$^{13}\text{C}$  NMR of **8**  
(125 MHz,  $\text{CDCl}_3$ )

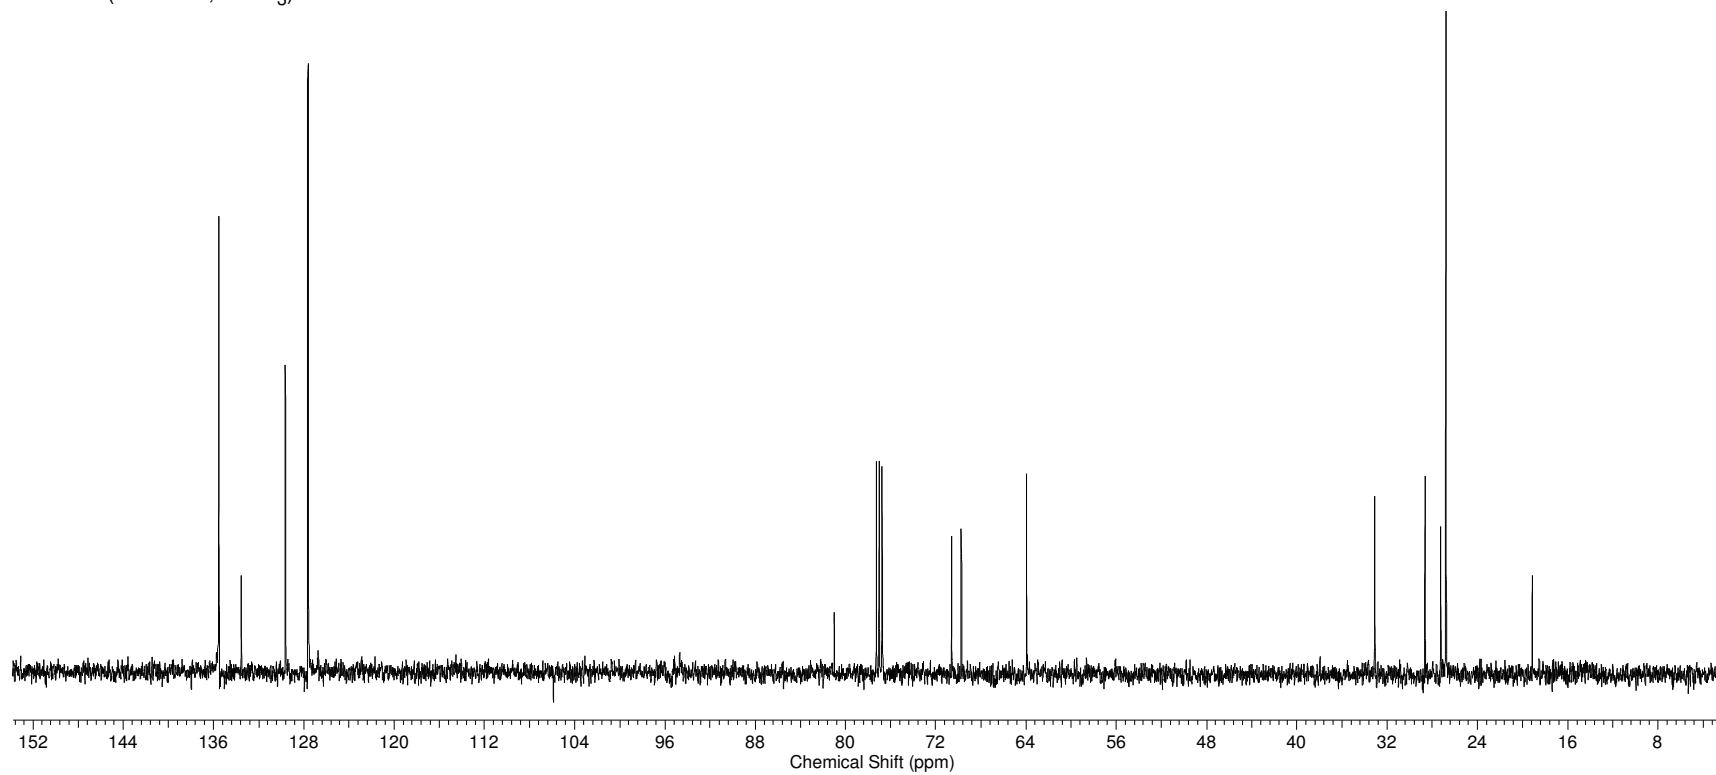



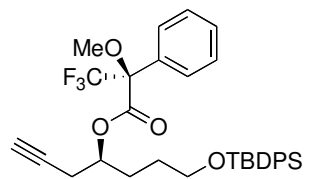

$^1\text{H}$  NMR of **8** *S*-(+)-mosher ester  
of the alcohol from propargylation  
with (*R*)-**D**  
(600 MHz,  $\text{CDCl}_3$ )

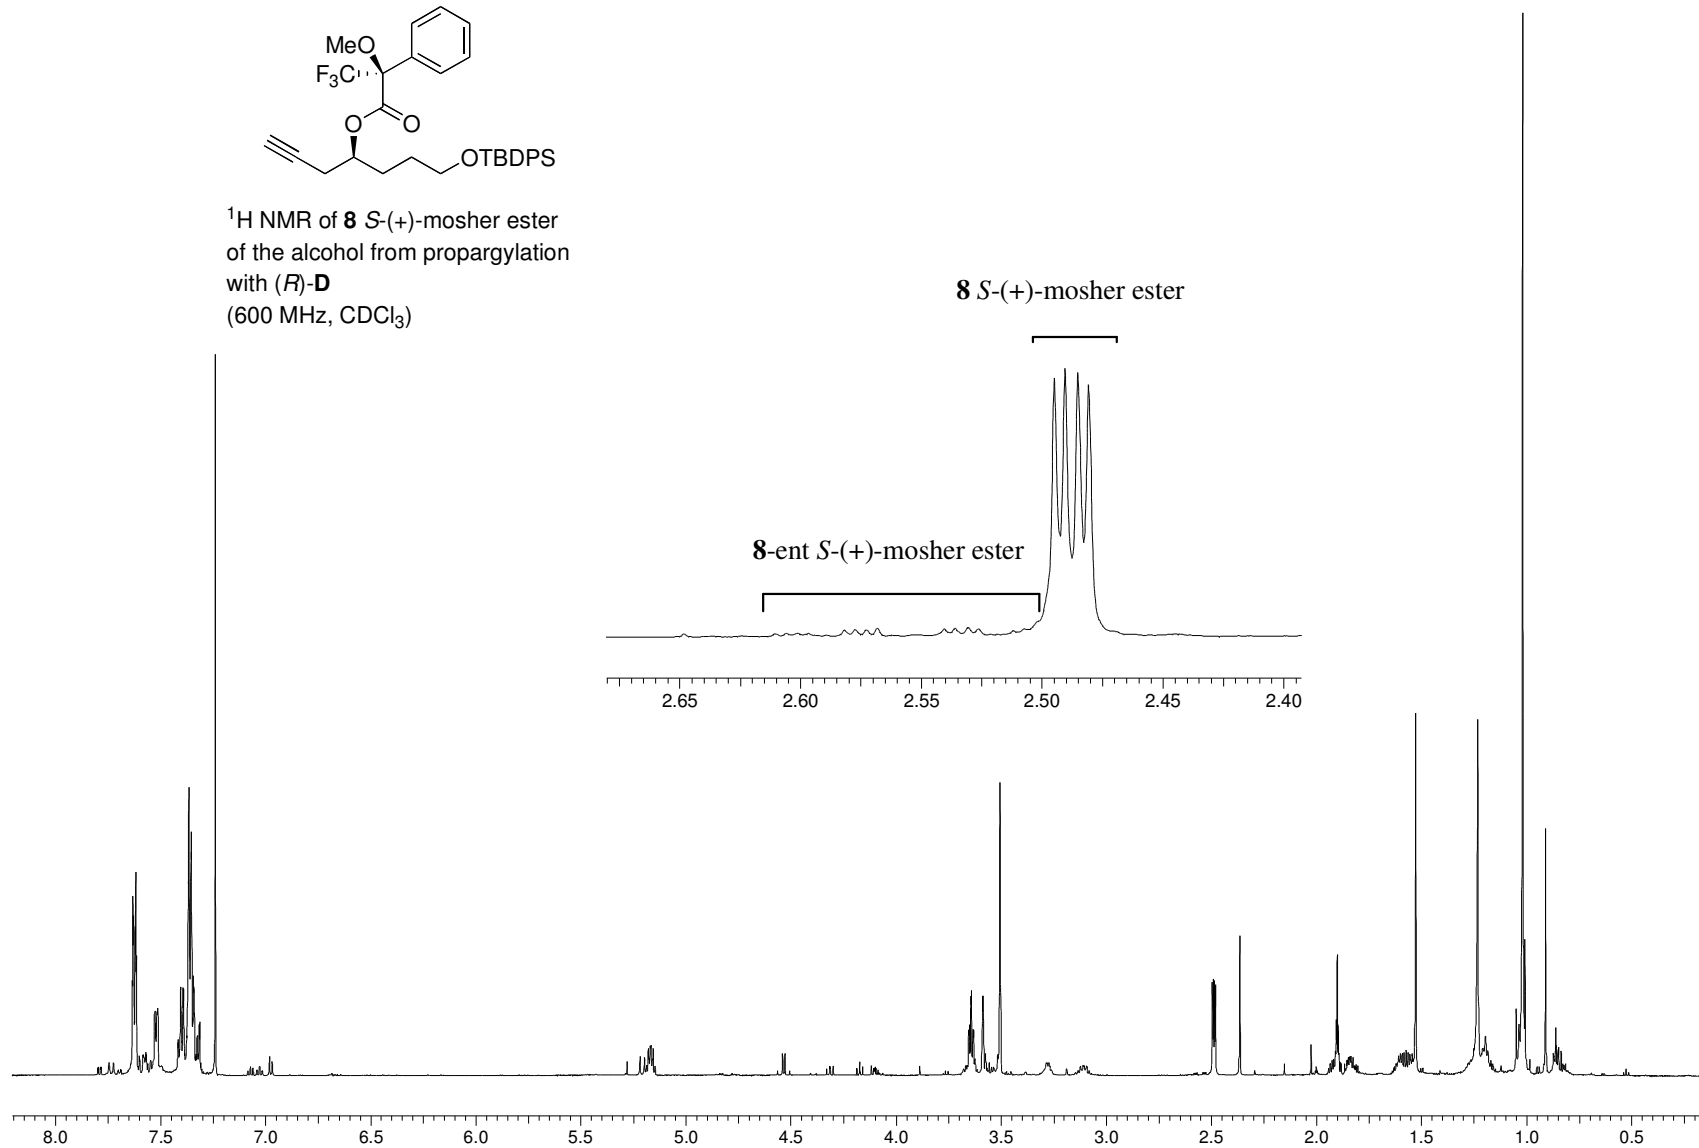

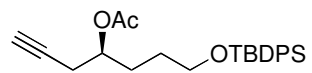

<sup>1</sup>H NMR of the acetate of **8**  
(500 MHz, CDCl<sub>3</sub>)

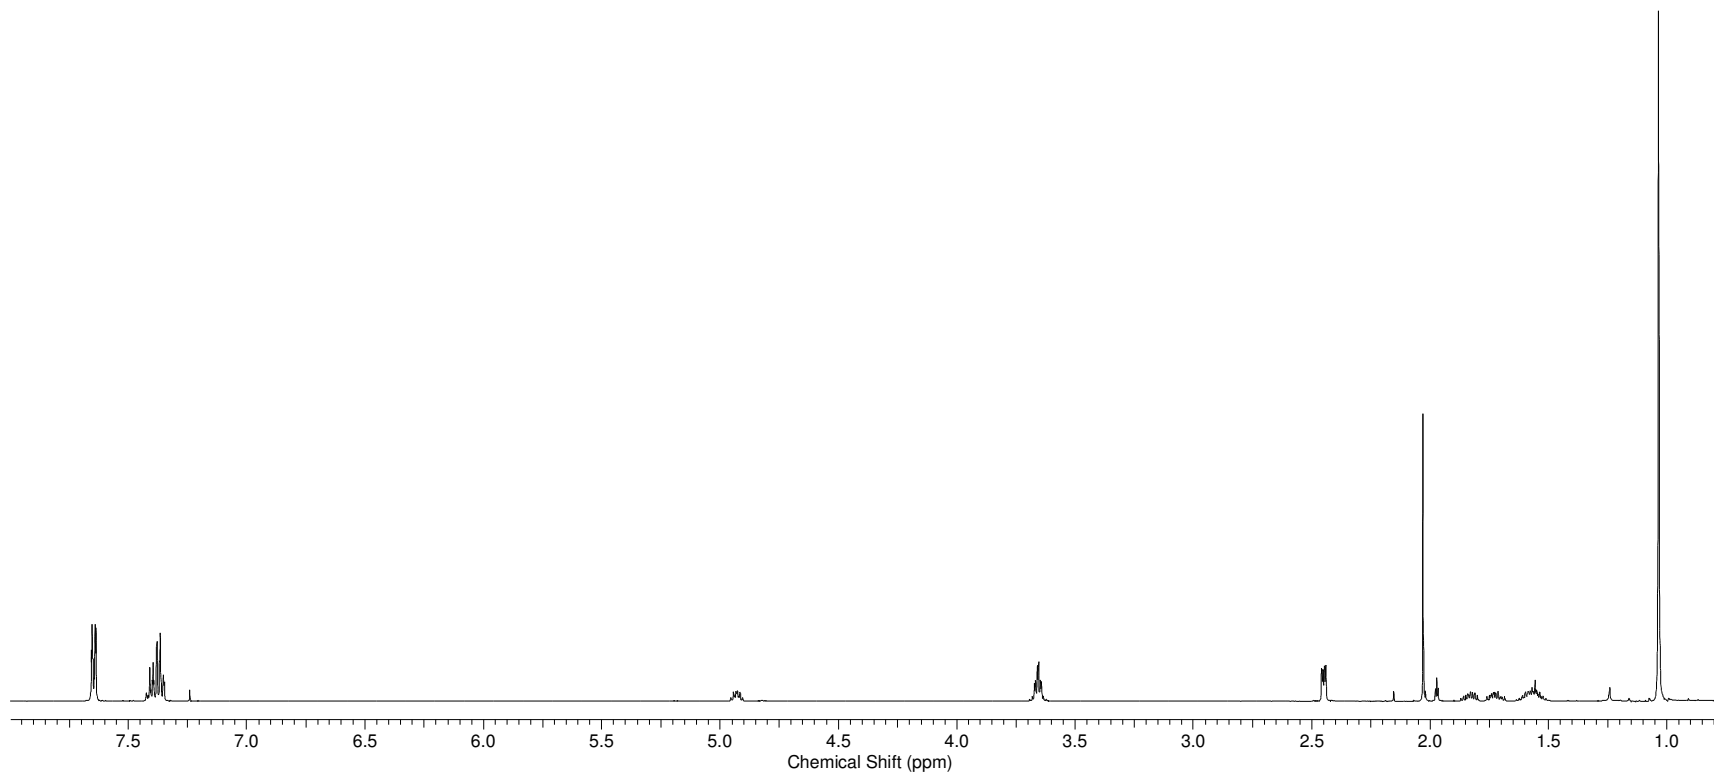

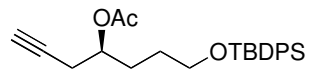

$^{13}\text{C}$  NMR of the acetate of **8**  
(125 MHz,  $\text{CDCl}_3$ )

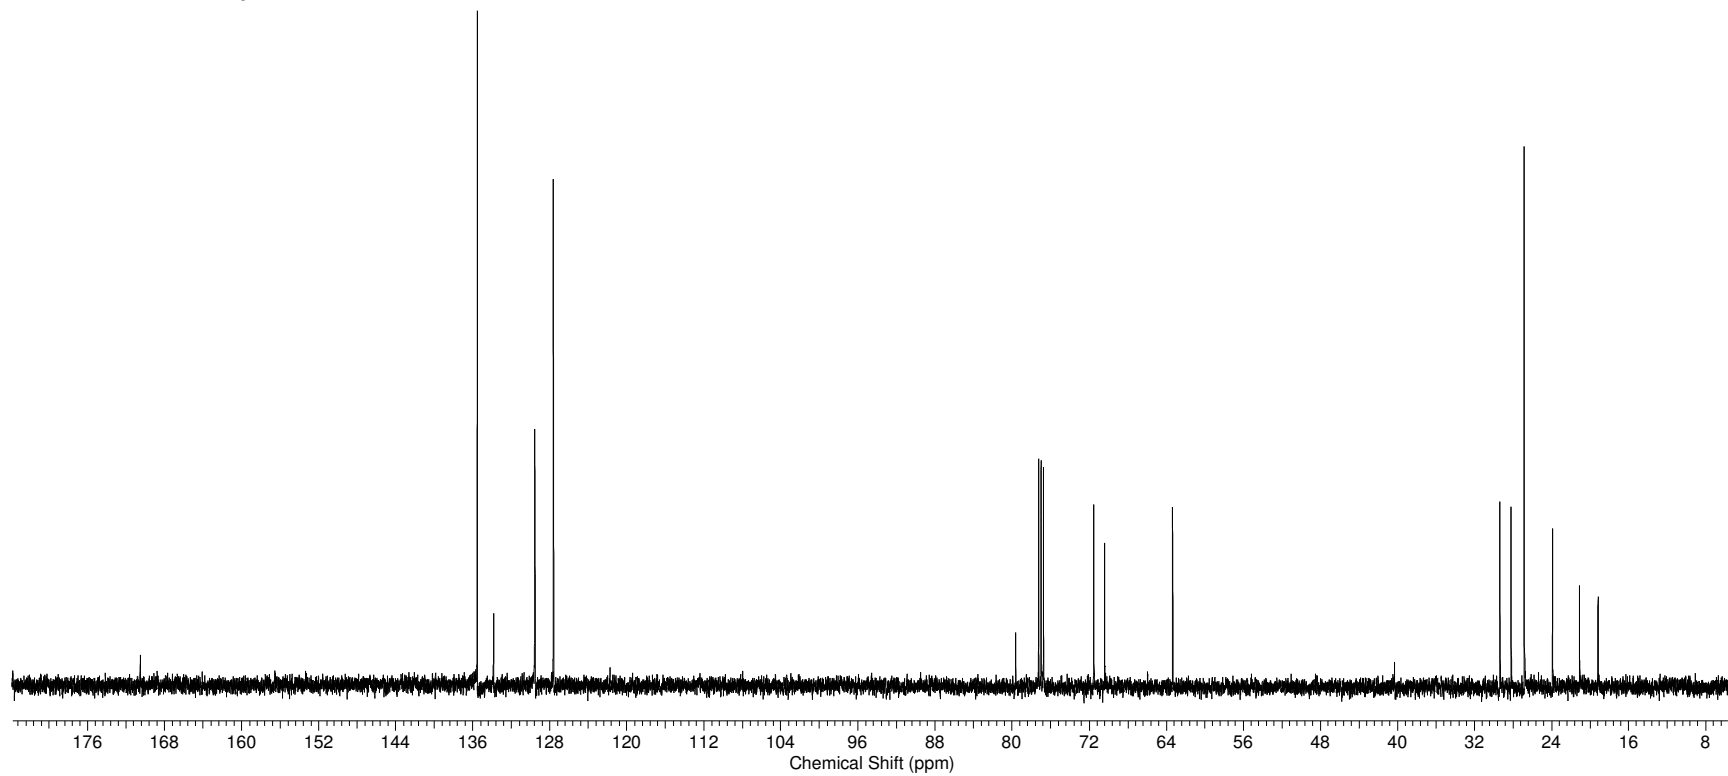



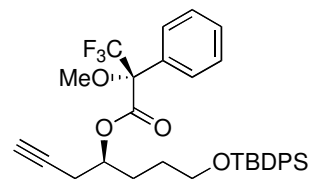

<sup>1</sup>H NMR of **8** *R*-(-)-mosher ester  
of the optically pure alcohol  
(600 MHz, CDCl<sub>3</sub>)

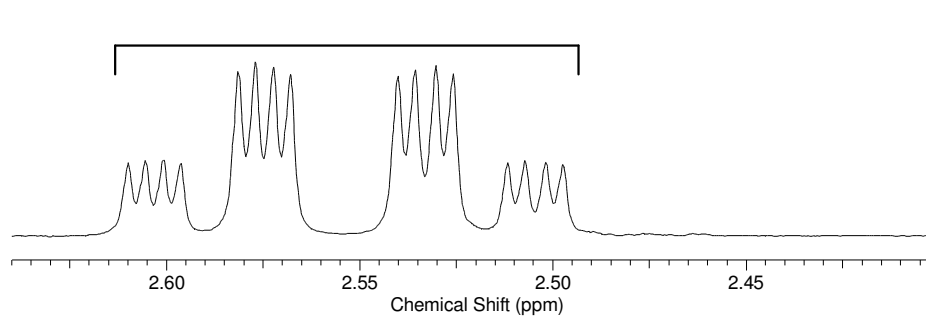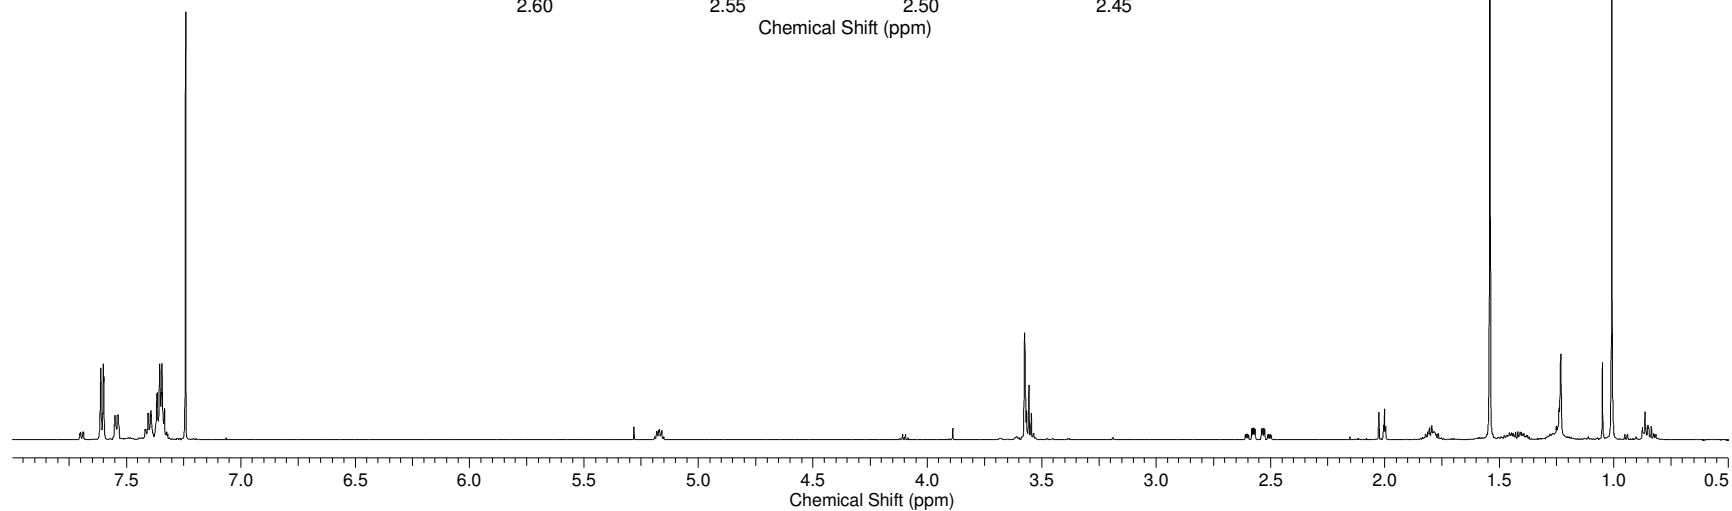

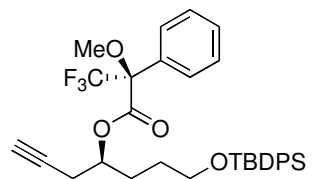

<sup>1</sup>H NMR of **8** *S*-(+)-mosher ester  
of the optically pure alcohol  
(600 MHz, CDCl<sub>3</sub>)

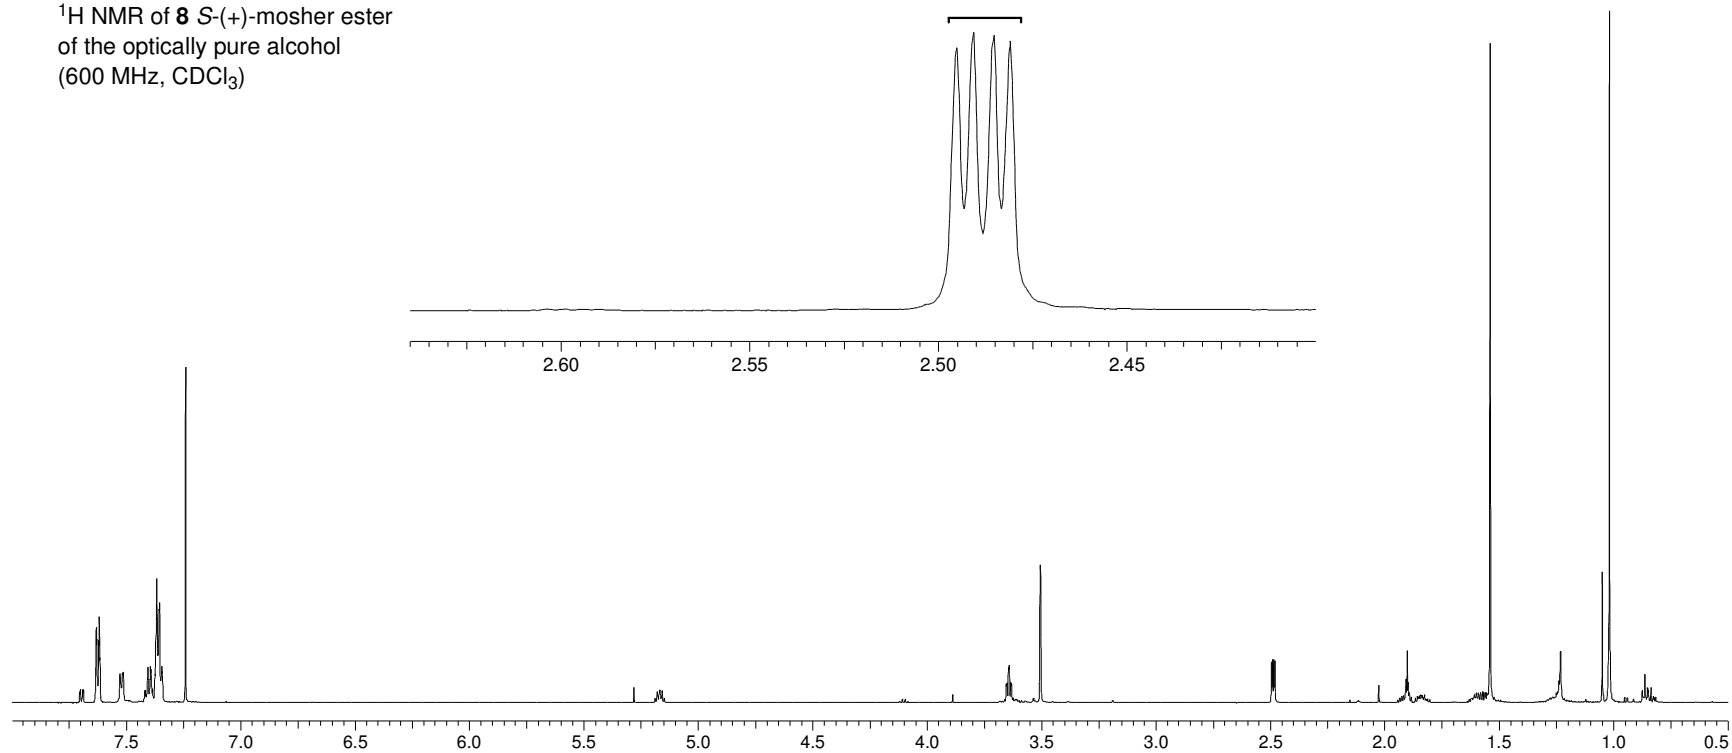

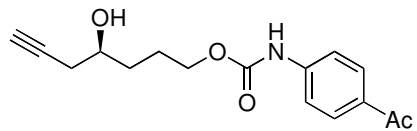

<sup>1</sup>H NMR of **S5**  
(500 MHz, CDCl<sub>3</sub>)

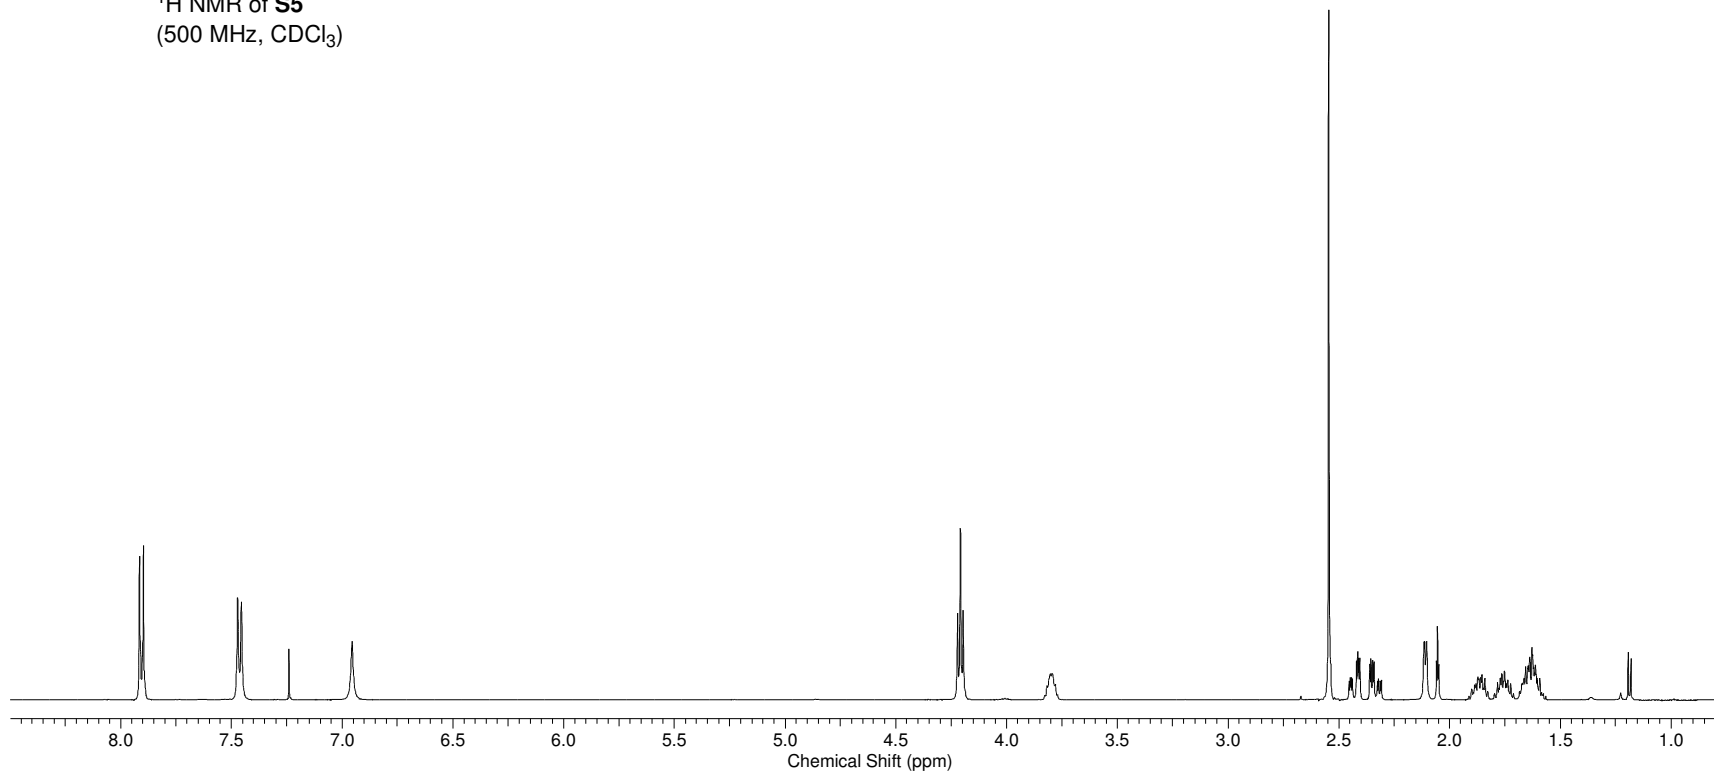

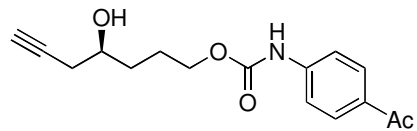

$^{13}\text{C}$  NMR of **S5**  
(125 MHz,  $\text{CDCl}_3$ )

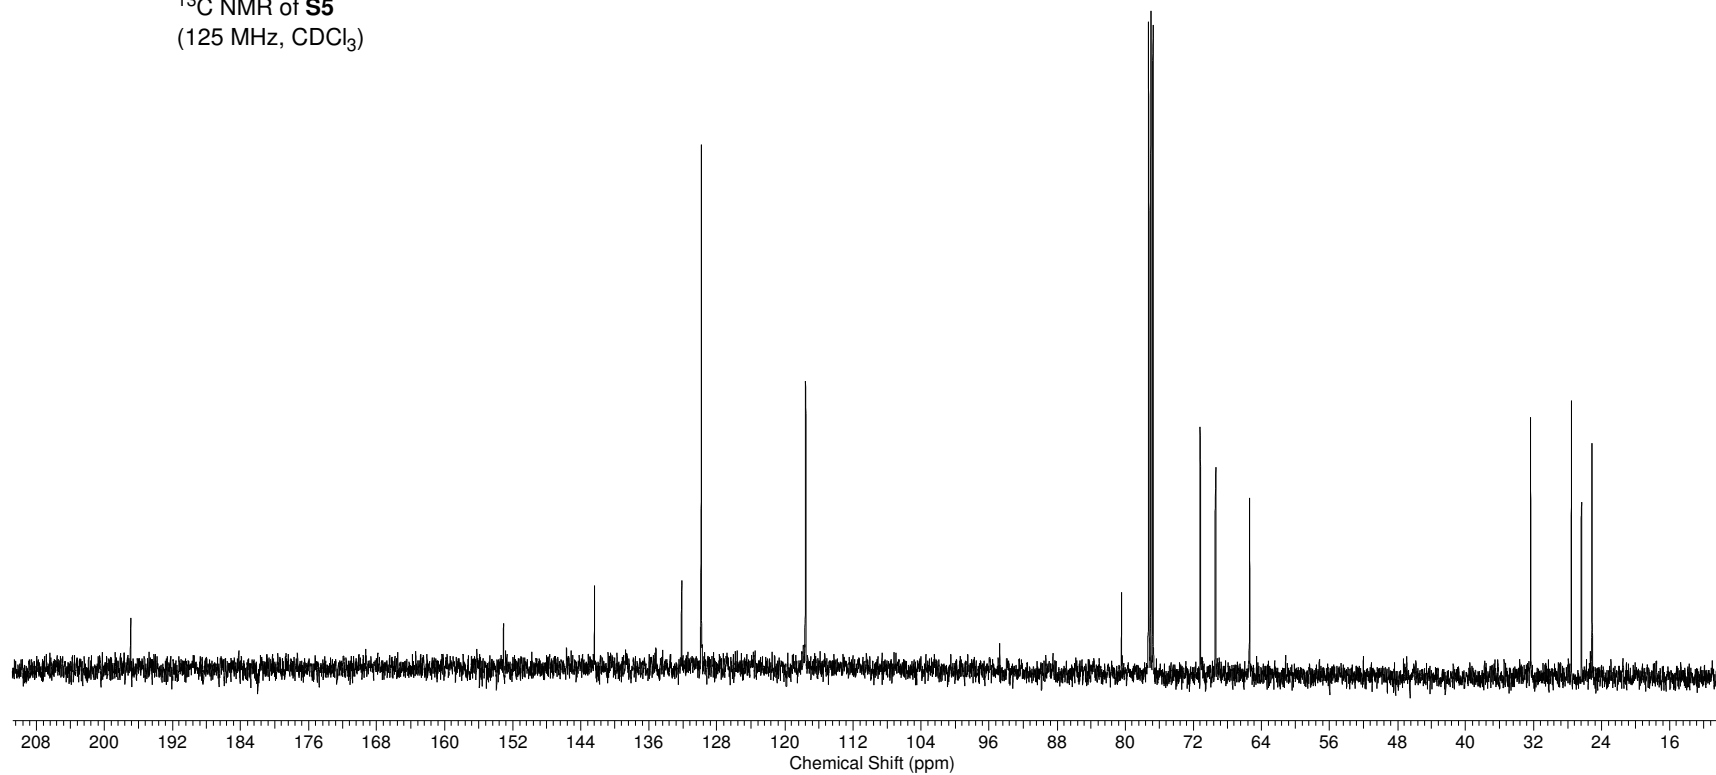

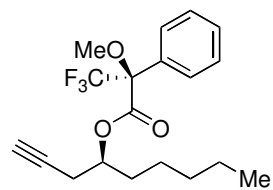

$^1\text{H}$  NMR of **S7** *S*-(+)-mosher ester  
of the alcohol from propargylation  
with (*R*)-**E**  
(600 MHz,  $\text{CDCl}_3$ )

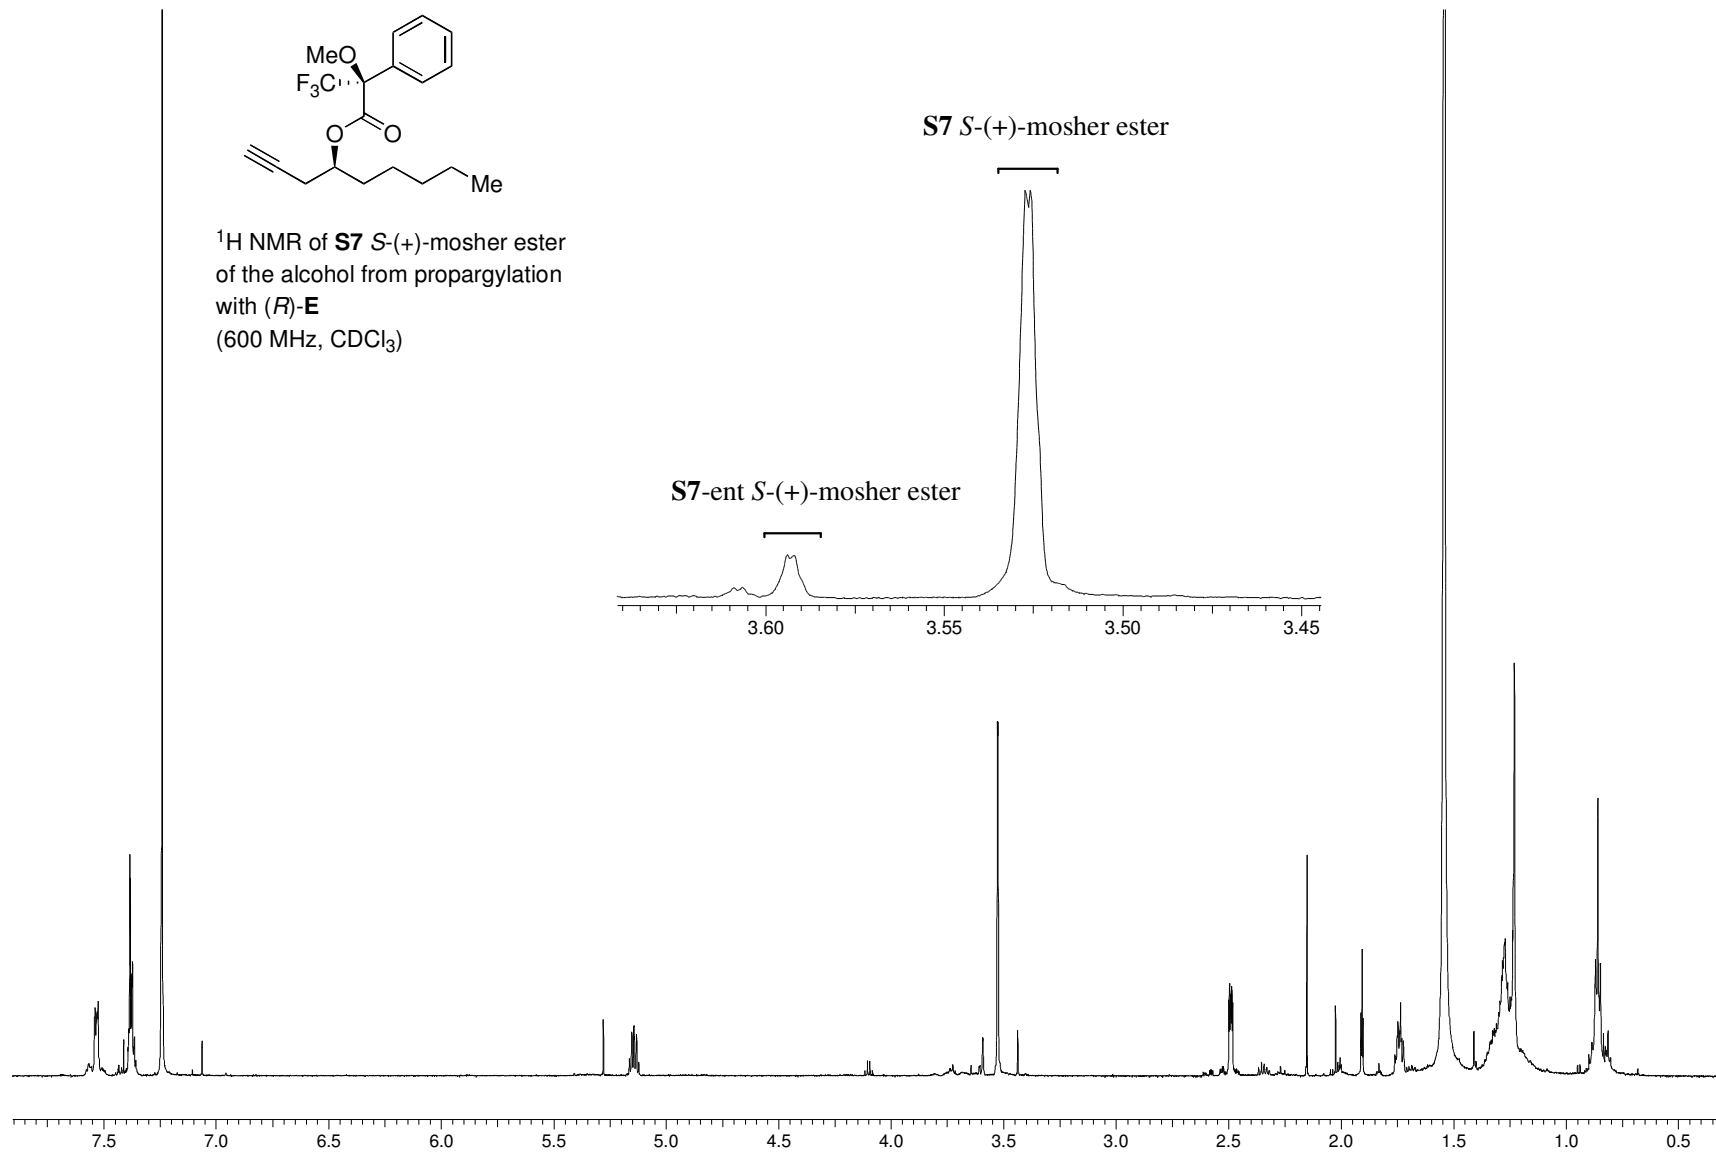

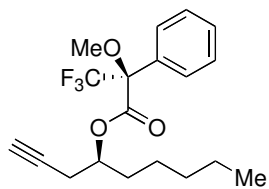

$^1\text{H}$  NMR of **S7** *S*-(+)-mosher ester  
of the alcohol from propargylation  
with (*R*)-**D**  
(600 MHz,  $\text{CDCl}_3$ )

**S7** *S*-(+)-mosher ester

**S7-ent** *S*-(+)-mosher ester

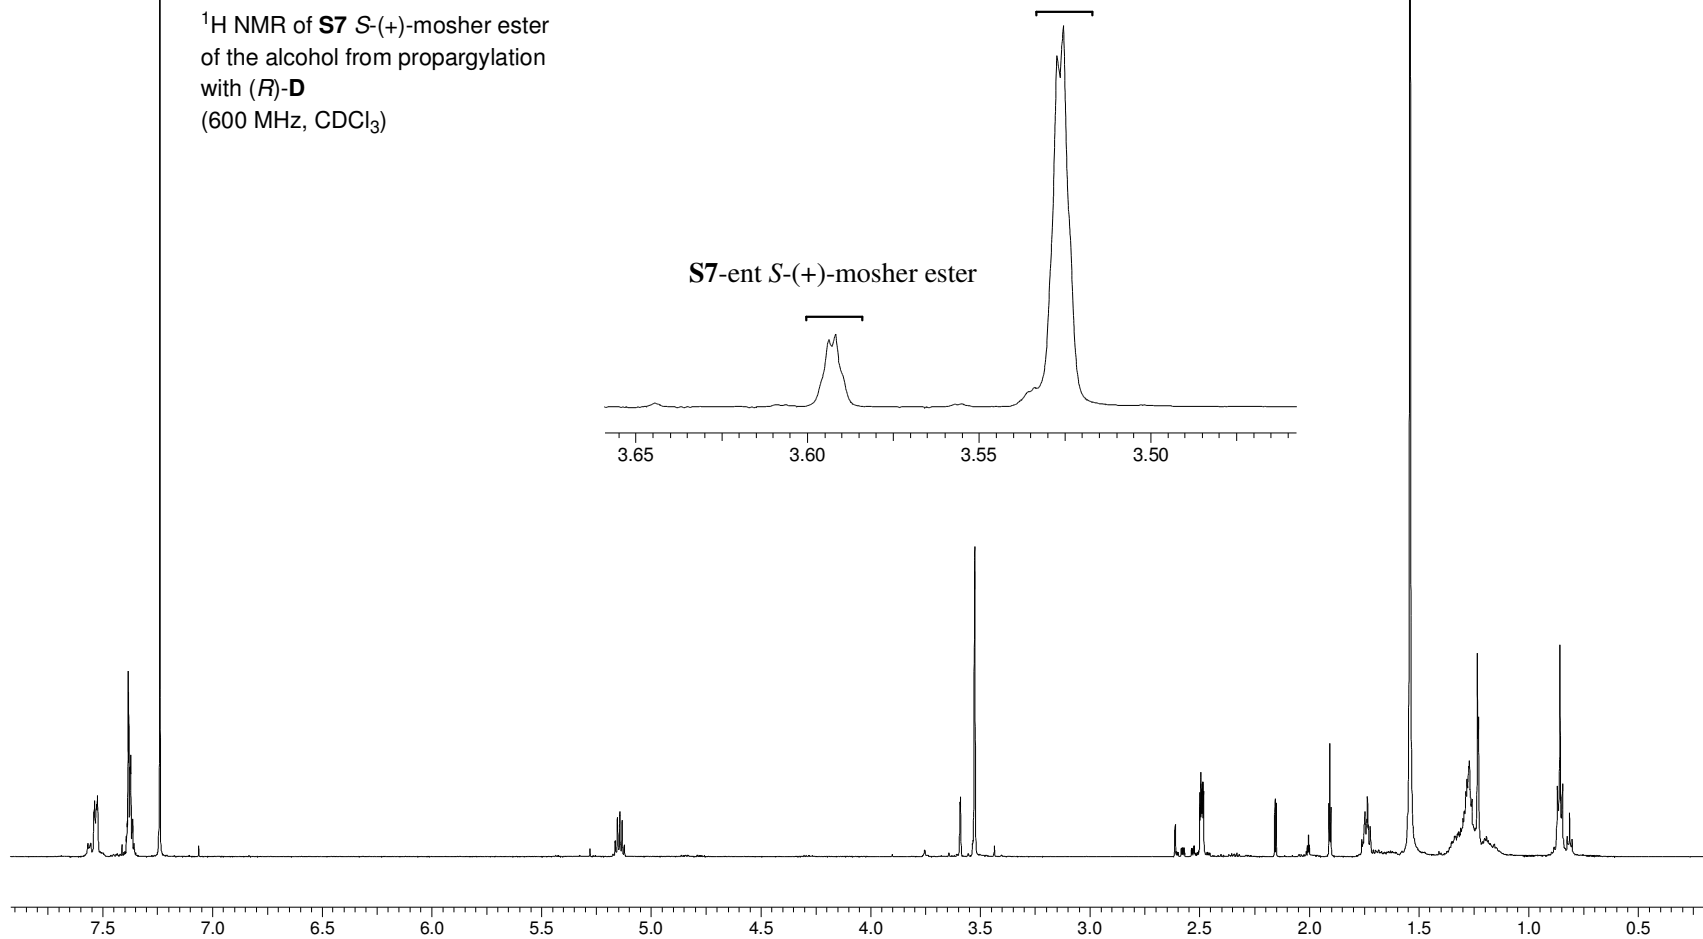

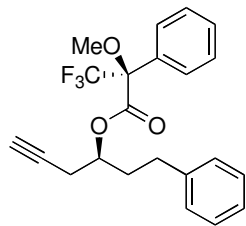

$^1\text{H}$  NMR of **S9** *S*-(+)-mosher ester  
of the alcohol from propargylation  
with (*R*)-**E**  
(600 MHz,  $\text{CDCl}_3$ )

**S9** *S*-(+)-mosher ester

**S9-ent** *S*-(+)-mosher ester

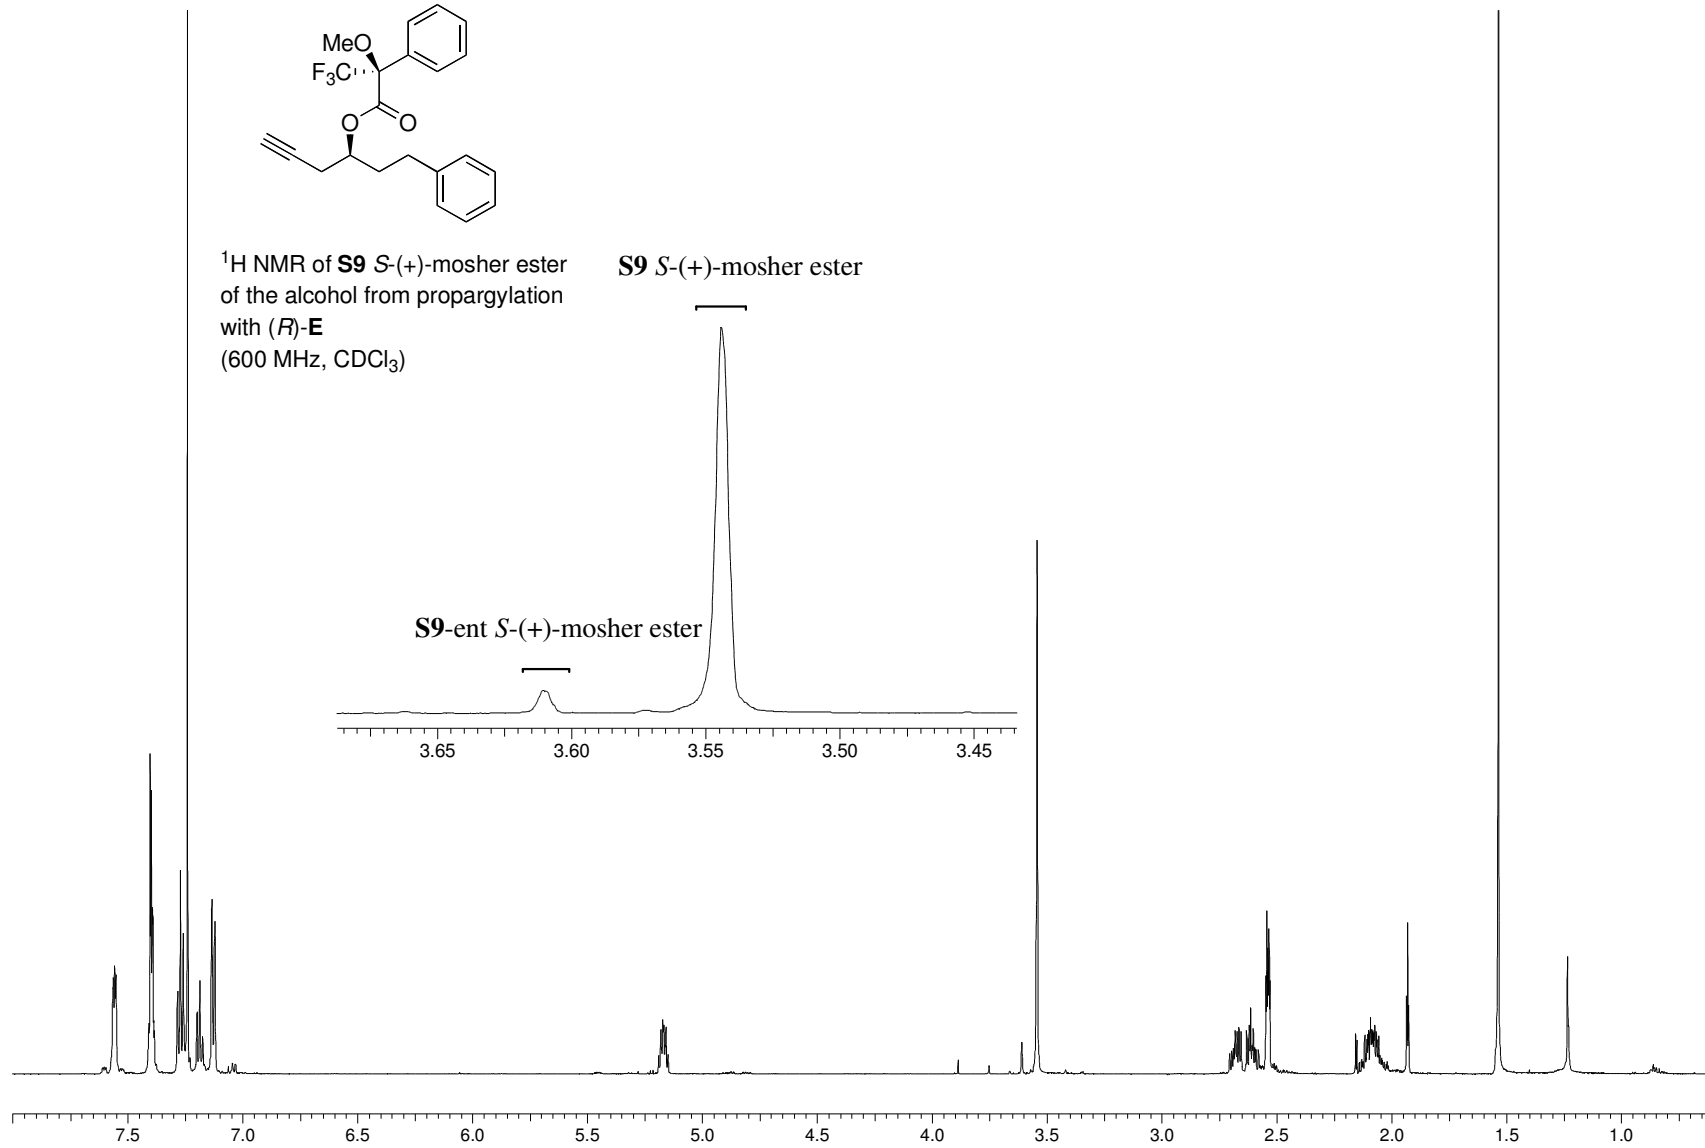

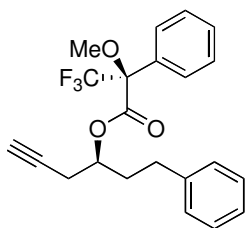

<sup>1</sup>H NMR of **S9** *S*-(+)-mosher ester  
of the alcohol from propargylation  
with (*R*)-**D**  
(600 MHz, CDCl<sub>3</sub>)

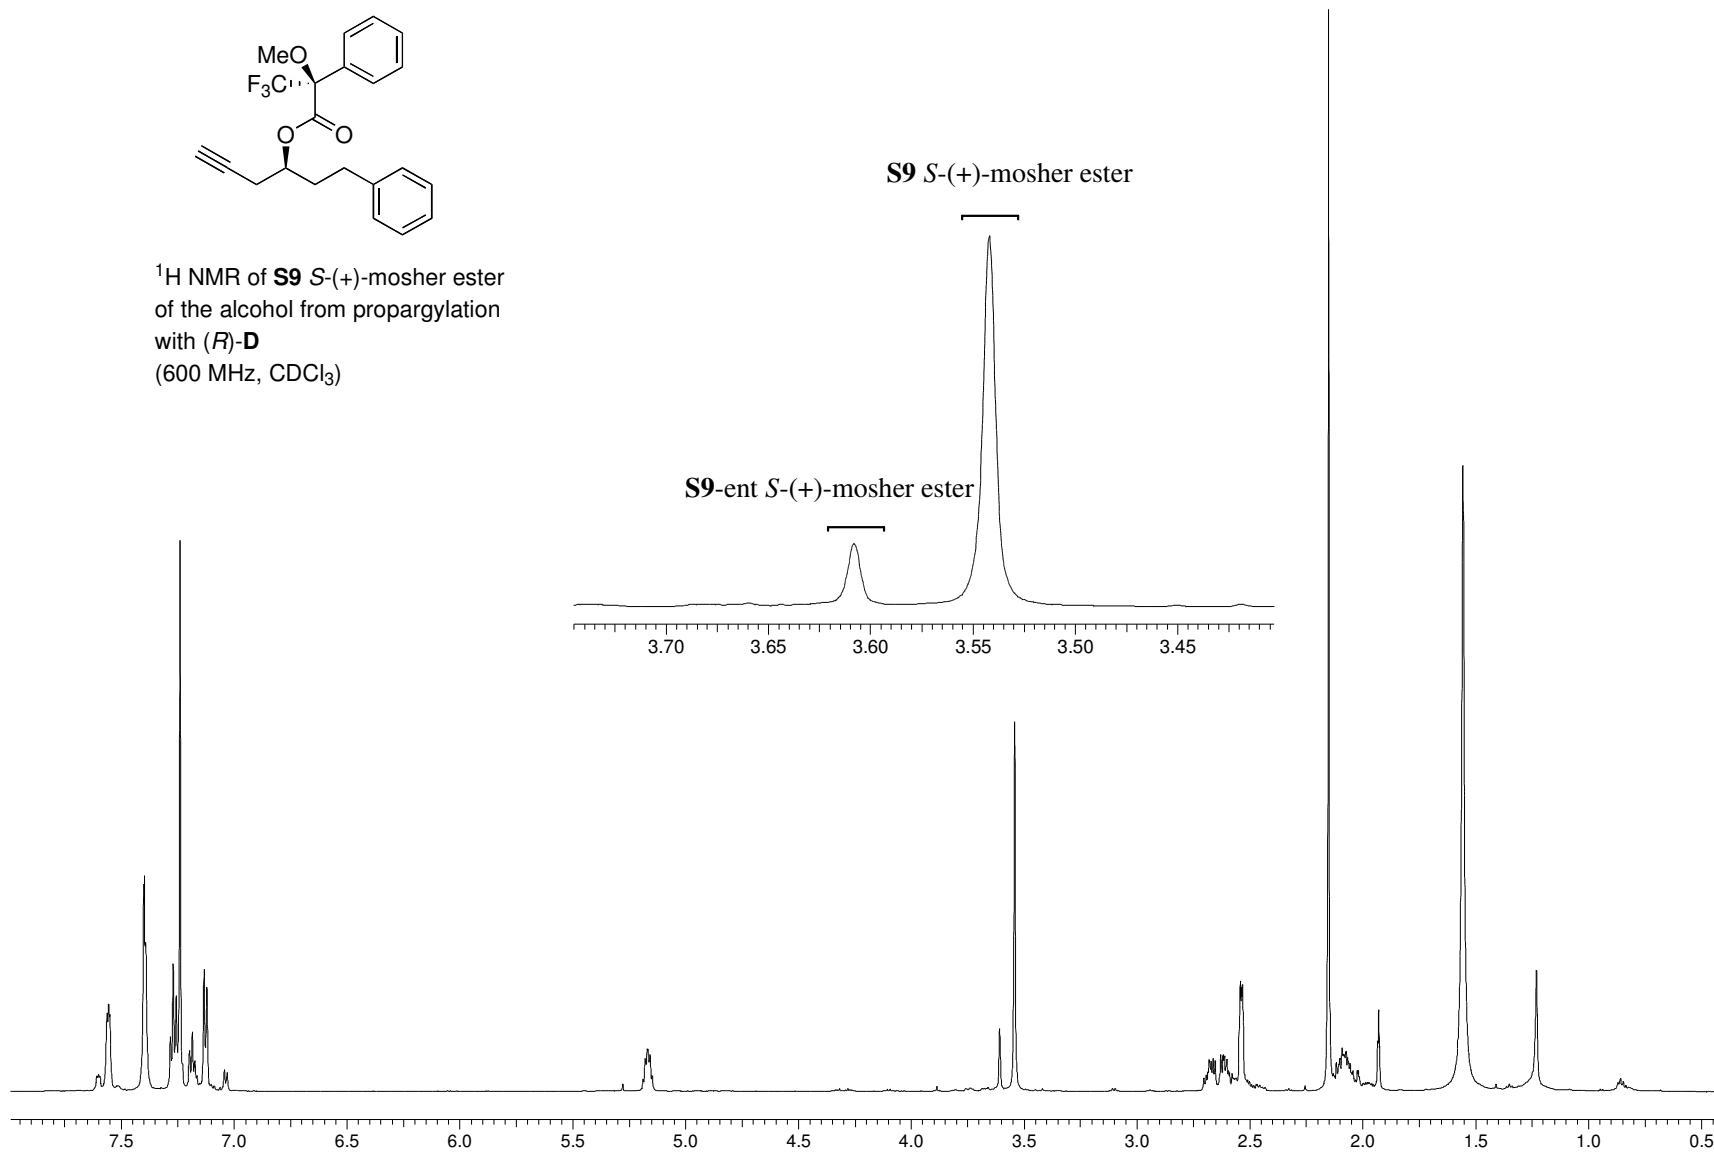



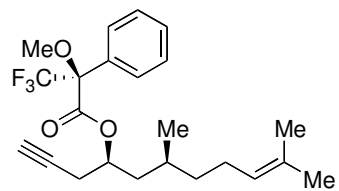

$^1\text{H}$  NMR of **S11** *S*-(+)-mosher ester  
of the alcohol from propargylation  
with (*R*)-**E**  
(600 MHz,  $\text{CDCl}_3$ )

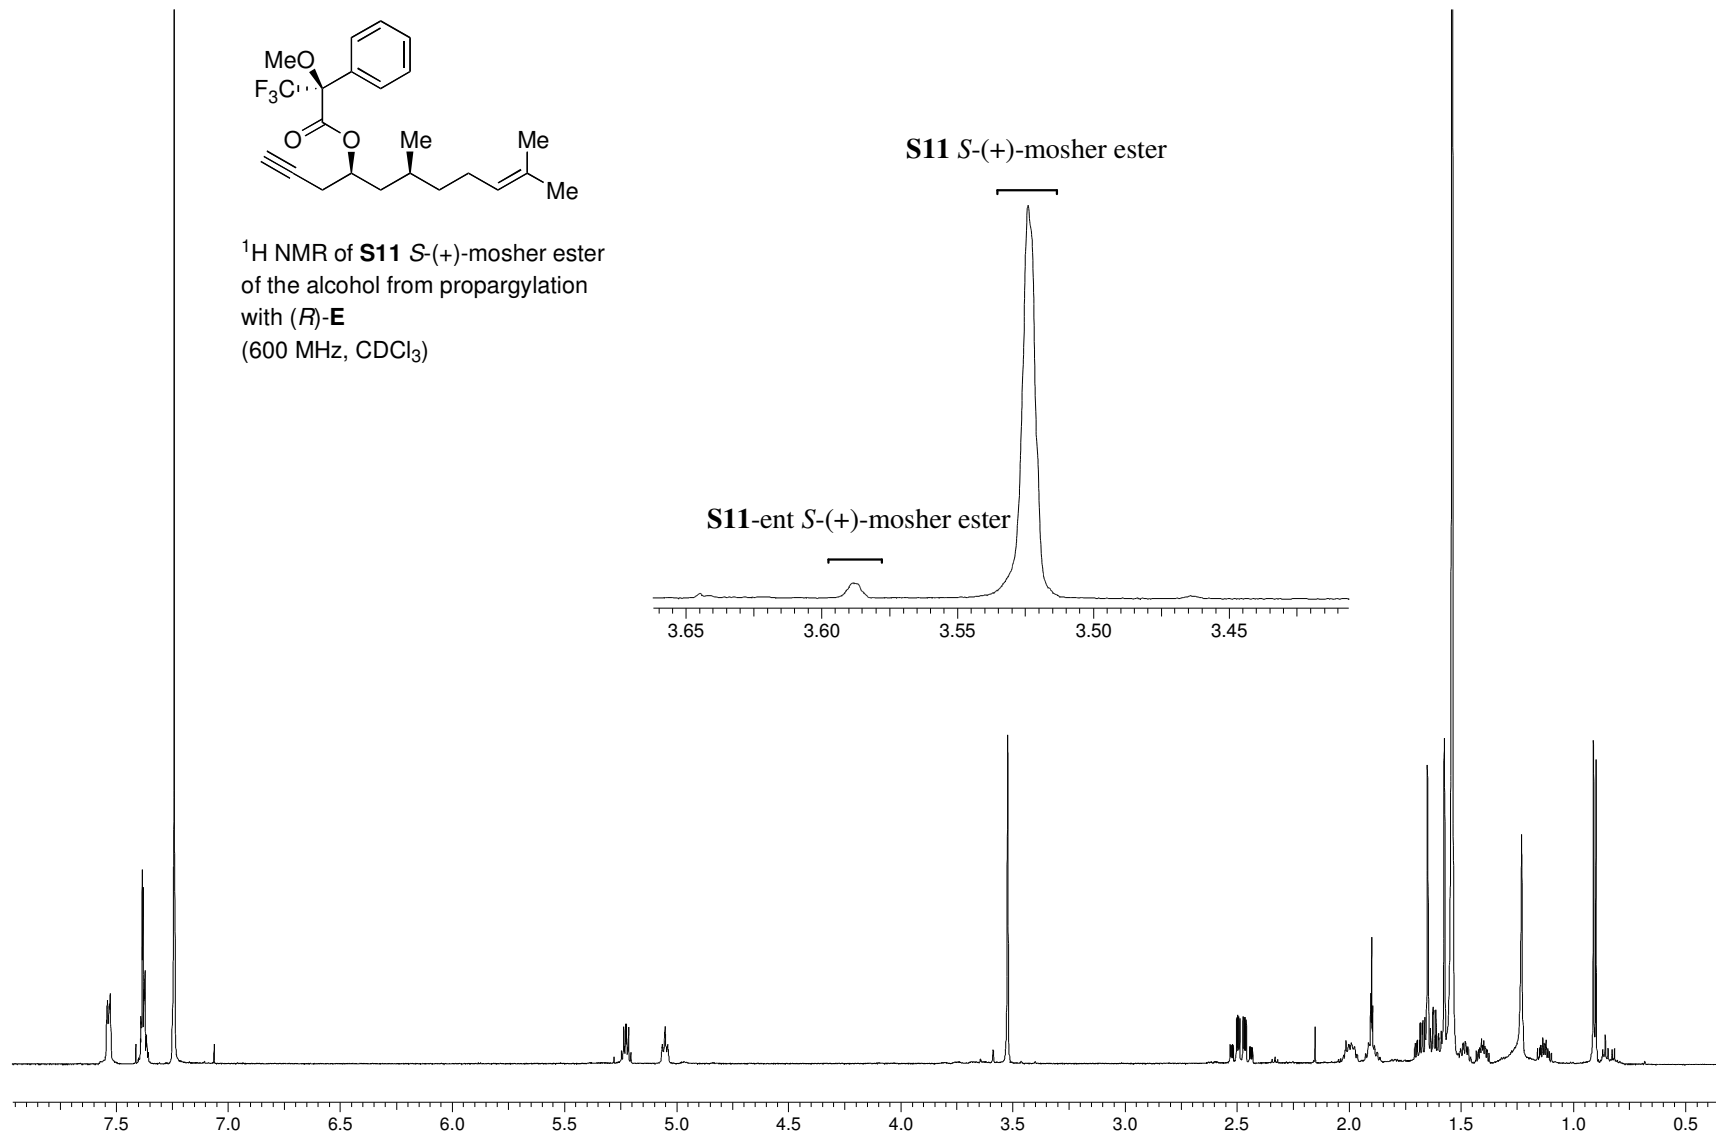

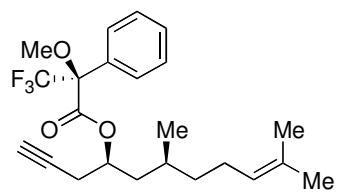

$^1\text{H}$  NMR of **S11** *S*(+)-mosher ester  
of the alcohol from propargylation  
with (*R*)-**D**  
(600 MHz,  $\text{CDCl}_3$ )

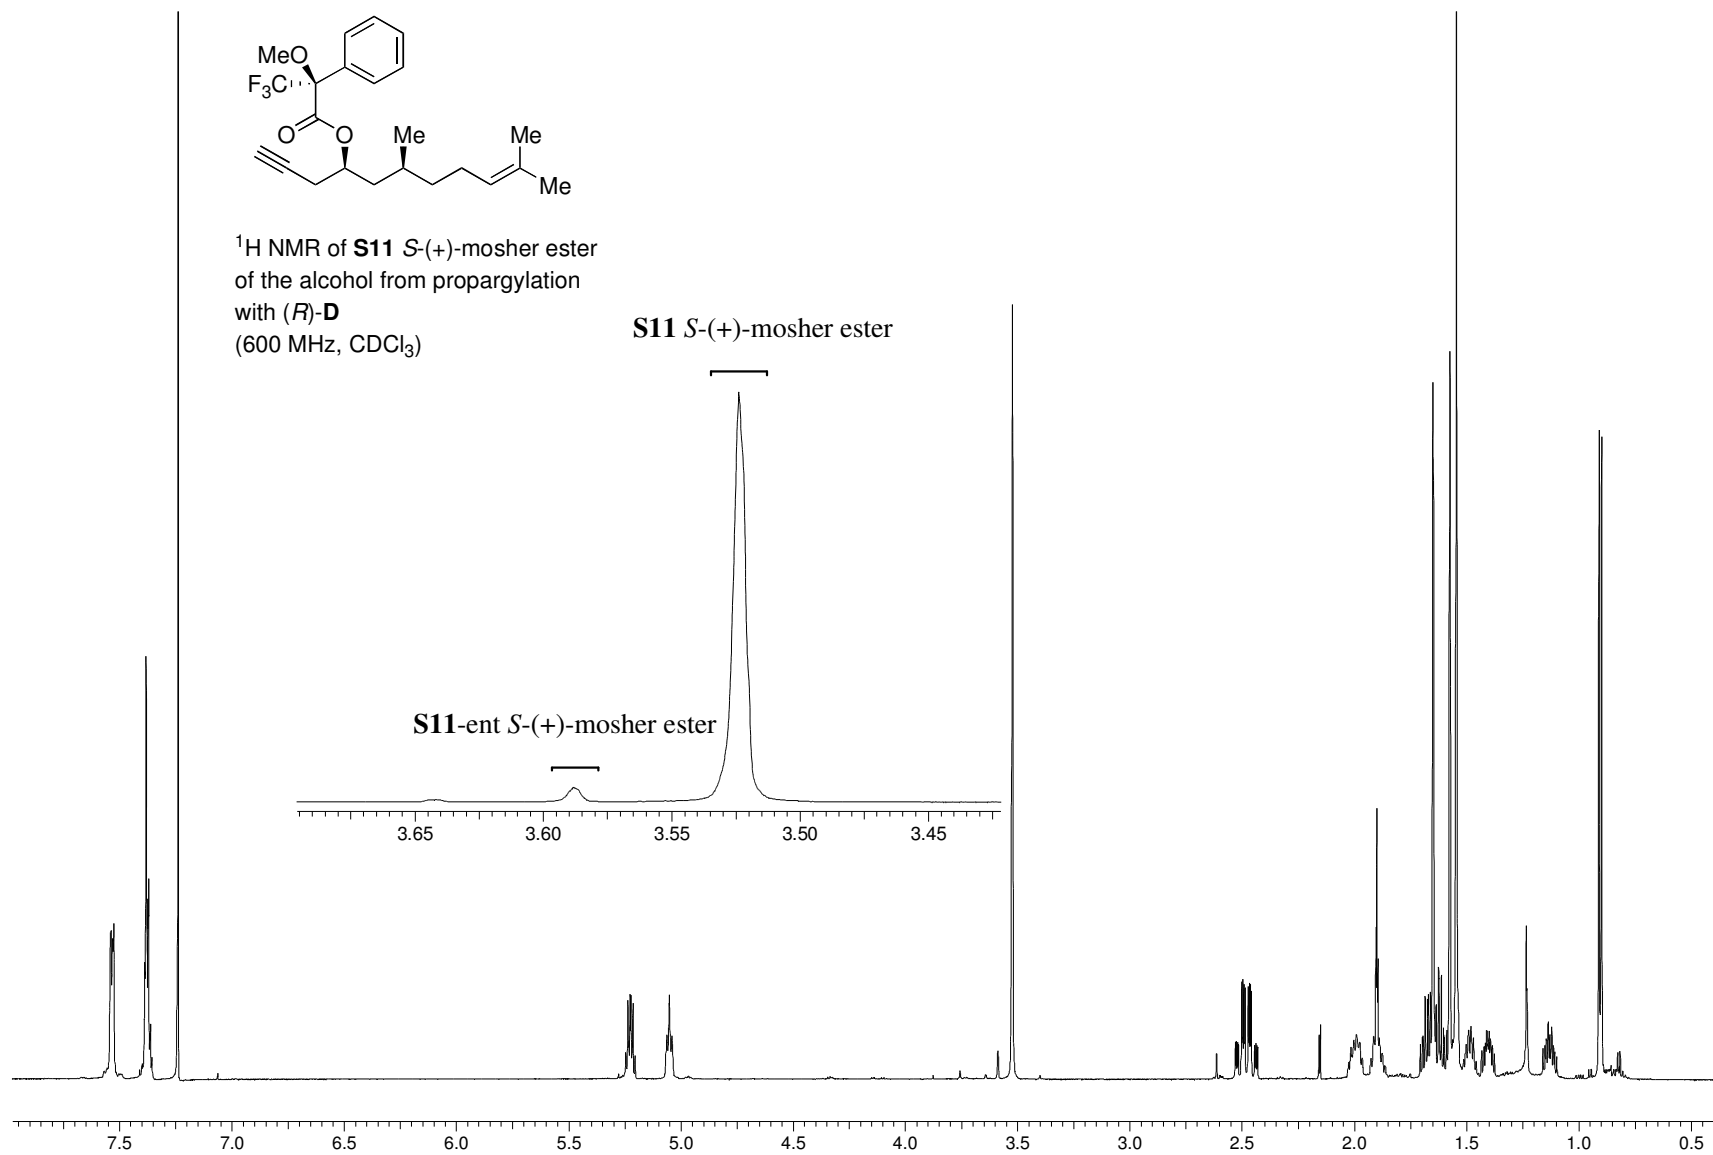

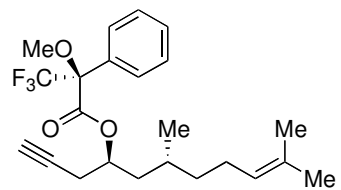

**S12 S-(+)-mosher ester**

<sup>1</sup>H NMR of **S12 S-(+)-mosher ester**  
of the alcohol from propargylation  
with (*R*)-**E**  
(600 MHz, benzene-d<sub>6</sub>)

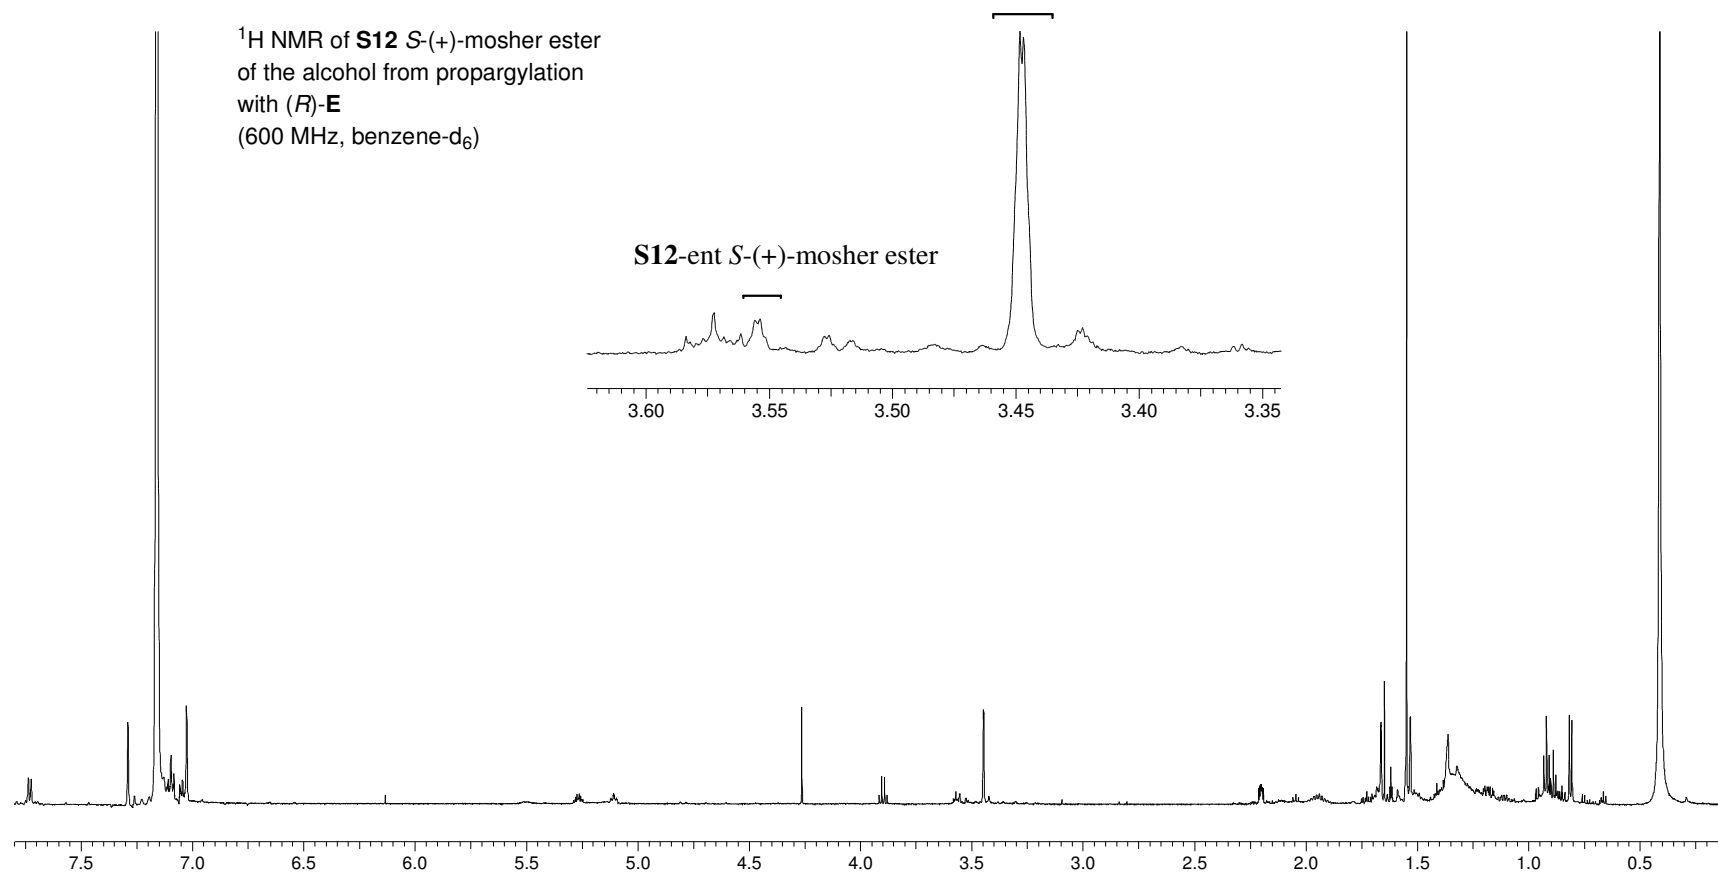

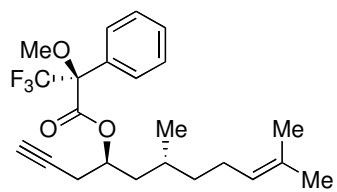

<sup>1</sup>H NMR of **S12** *S*-(+)-mosher ester  
of the alcohol from propargylation  
with (*R*)-**D**  
(600 MHz, benzene-d<sub>6</sub>)

**S12** *S*-(+)-mosher ester

**S12-ent** *S*-(+)-mosher ester

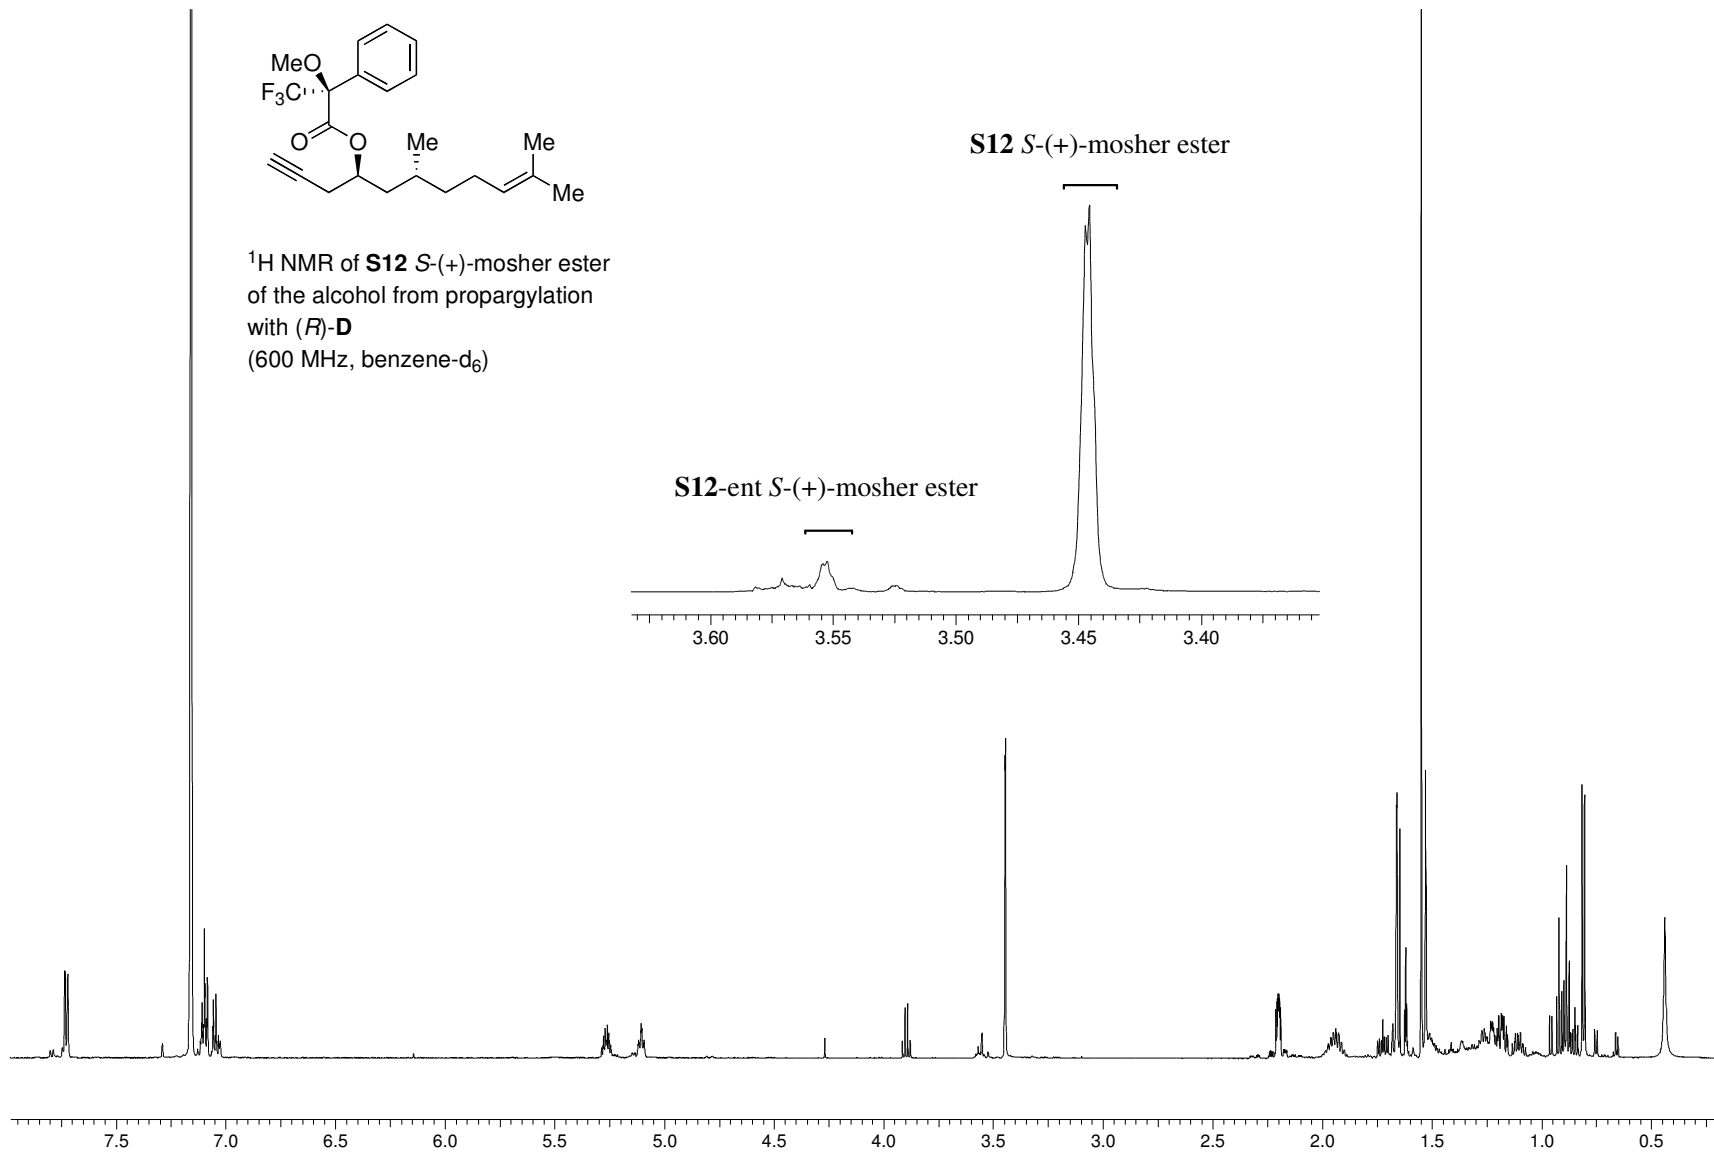

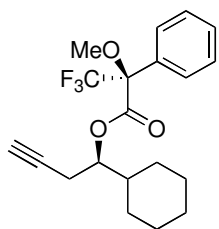

$^1\text{H}$  NMR of **S14** *S*-(+)-mosher ester  
of the alcohol from propargylation  
with (*R*)-**E**  
(600 MHz,  $\text{CDCl}_3$ )

**S14** *S*-(+)-mosher ester

**S14-ent** *S*-(+)-mosher ester

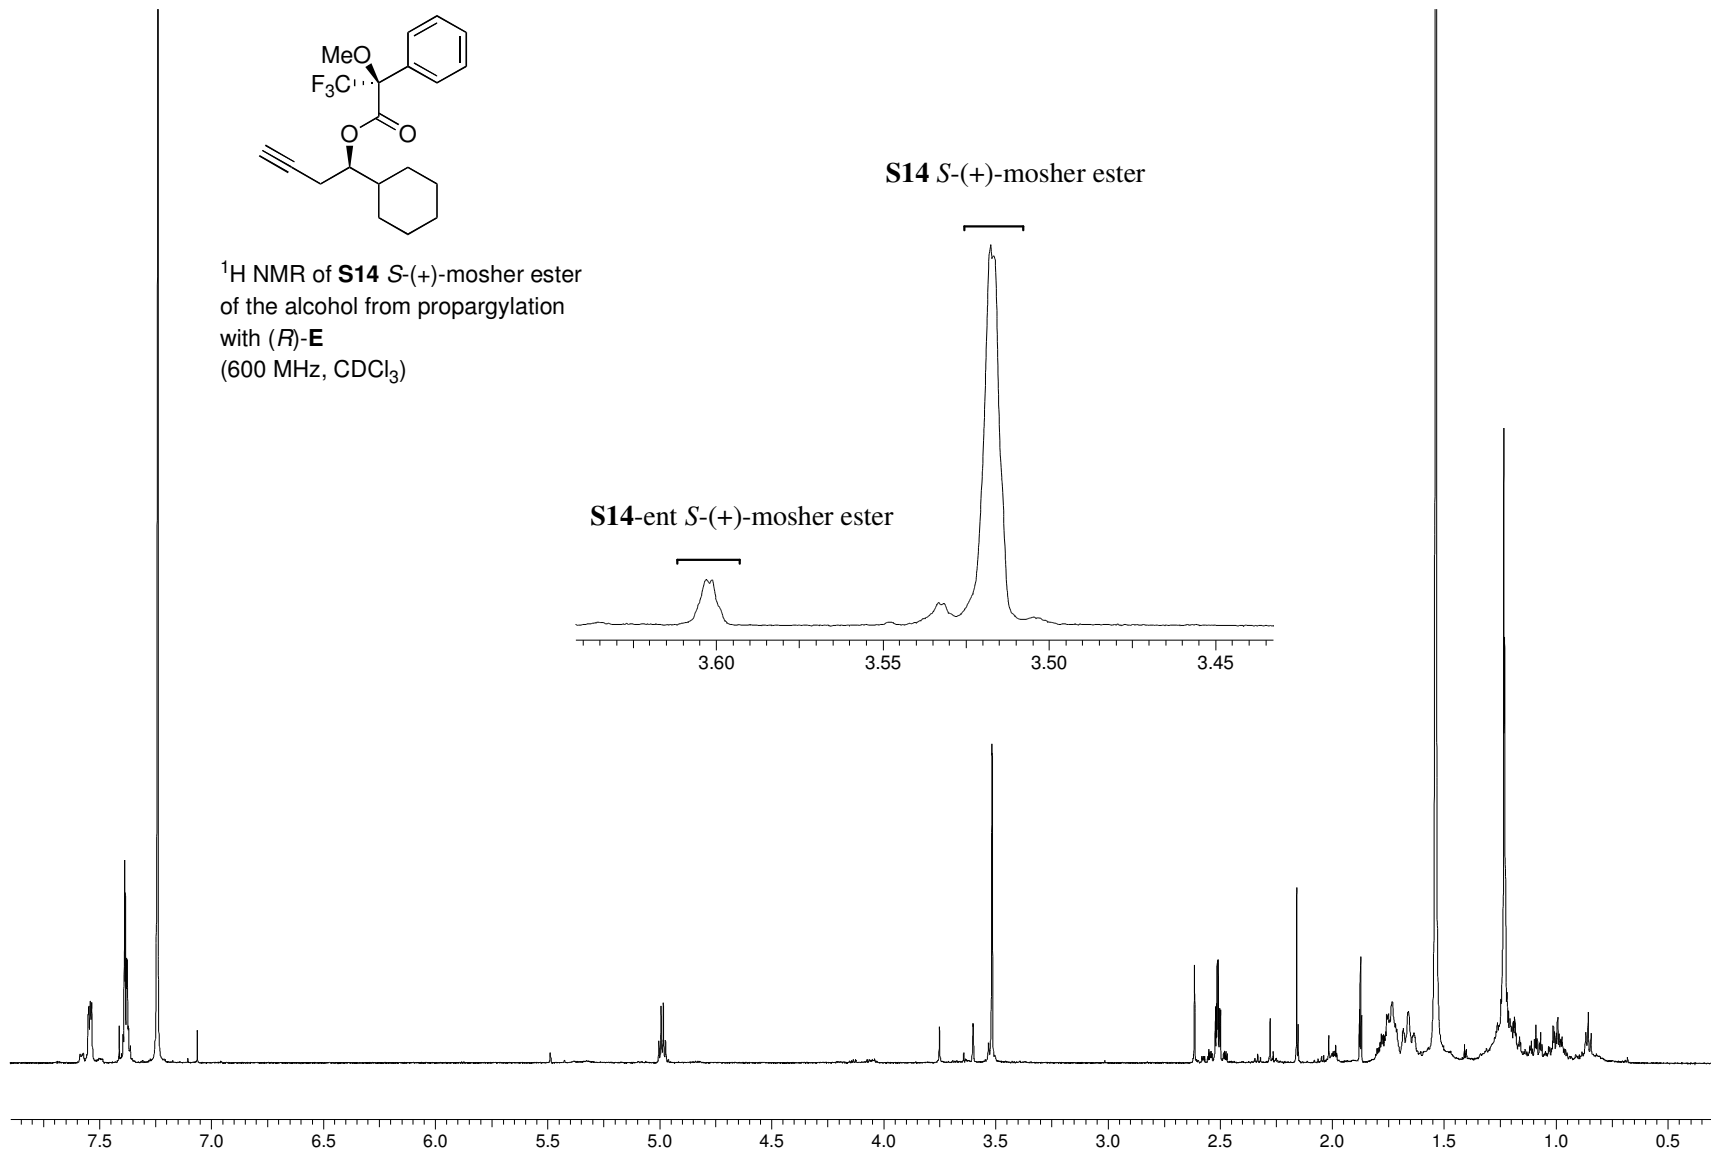

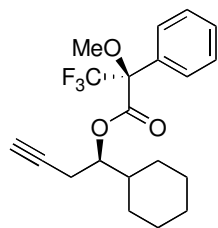

<sup>1</sup>H NMR of **S14** *S*-(+)-mosher ester  
of the alcohol from propargylation  
with (*R*)-**D**  
(600 MHz, CDCl<sub>3</sub>)

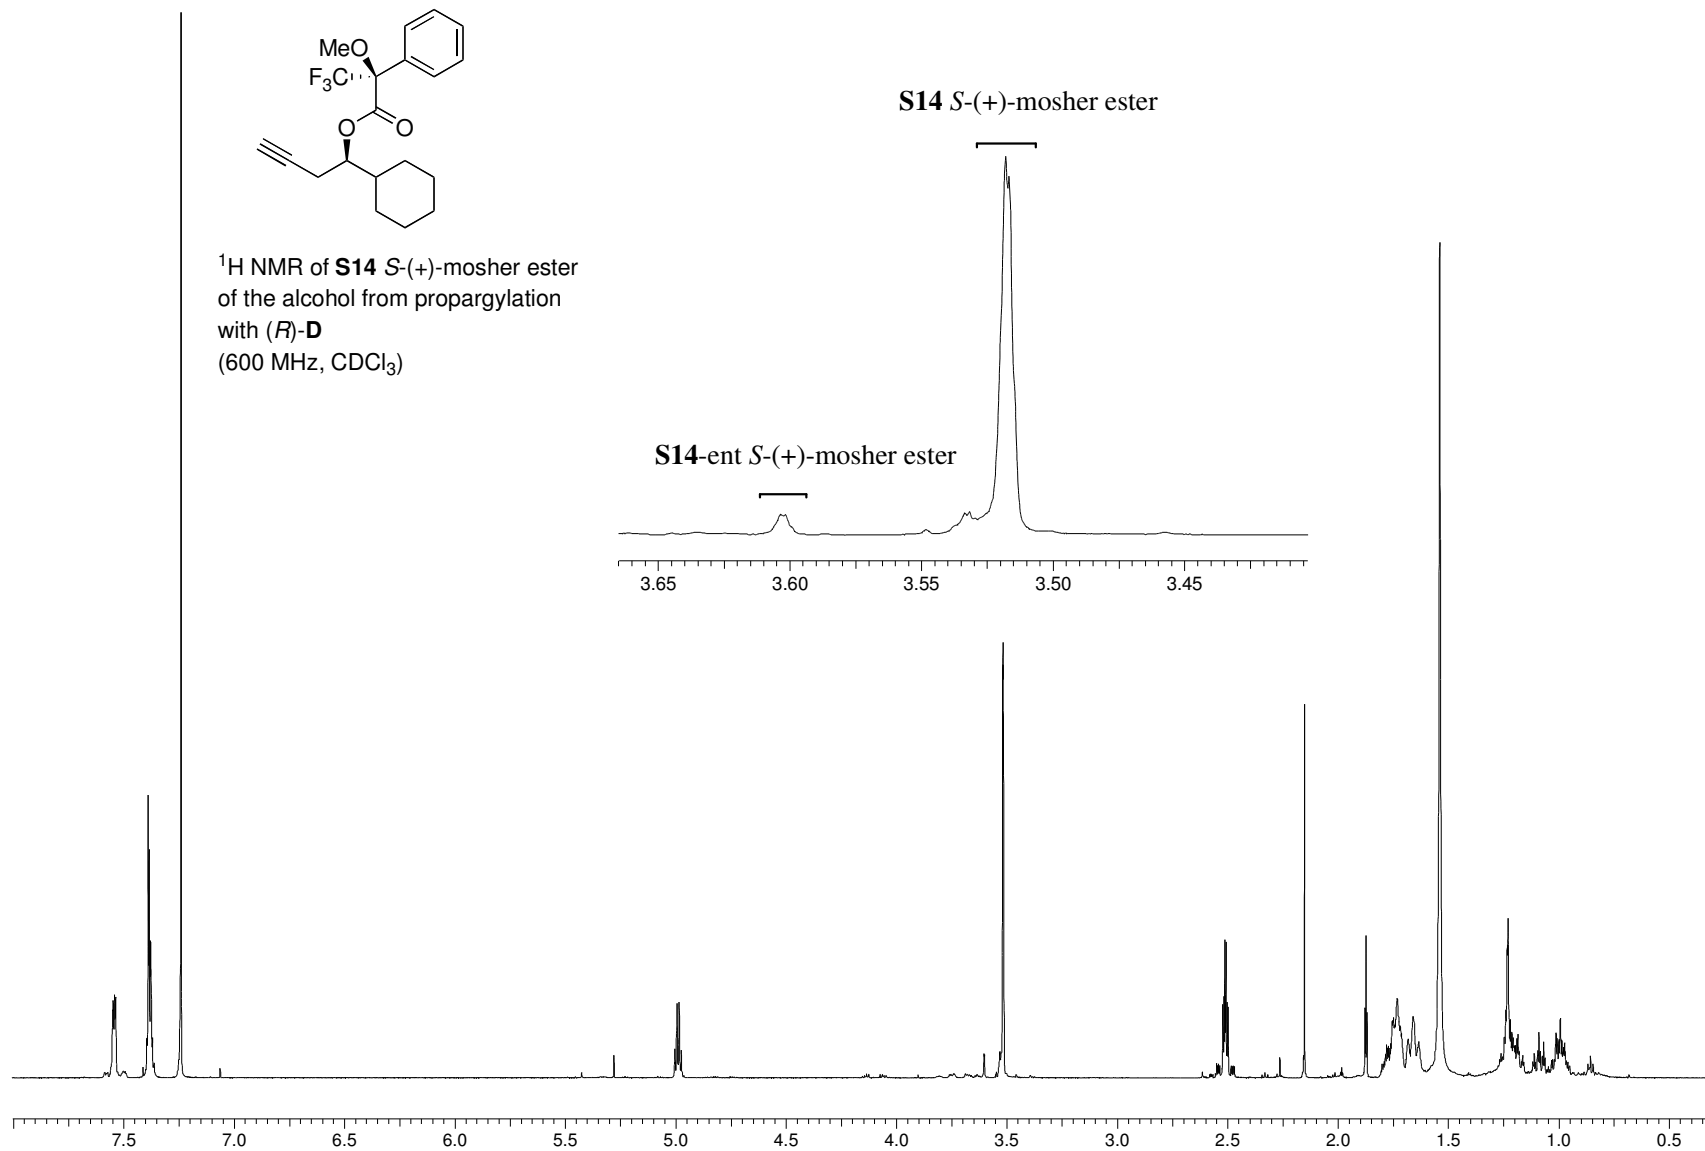

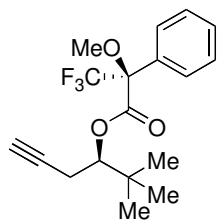

$^1\text{H}$  NMR of **S16** *S*-(+)-mosher ester  
of the alcohol from propargylation  
with (*R*)-**E**  
(600 MHz,  $\text{CDCl}_3$ )

**S16** *S*-(+)-mosher ester

**S16-ent** *S*-(+)-mosher ester

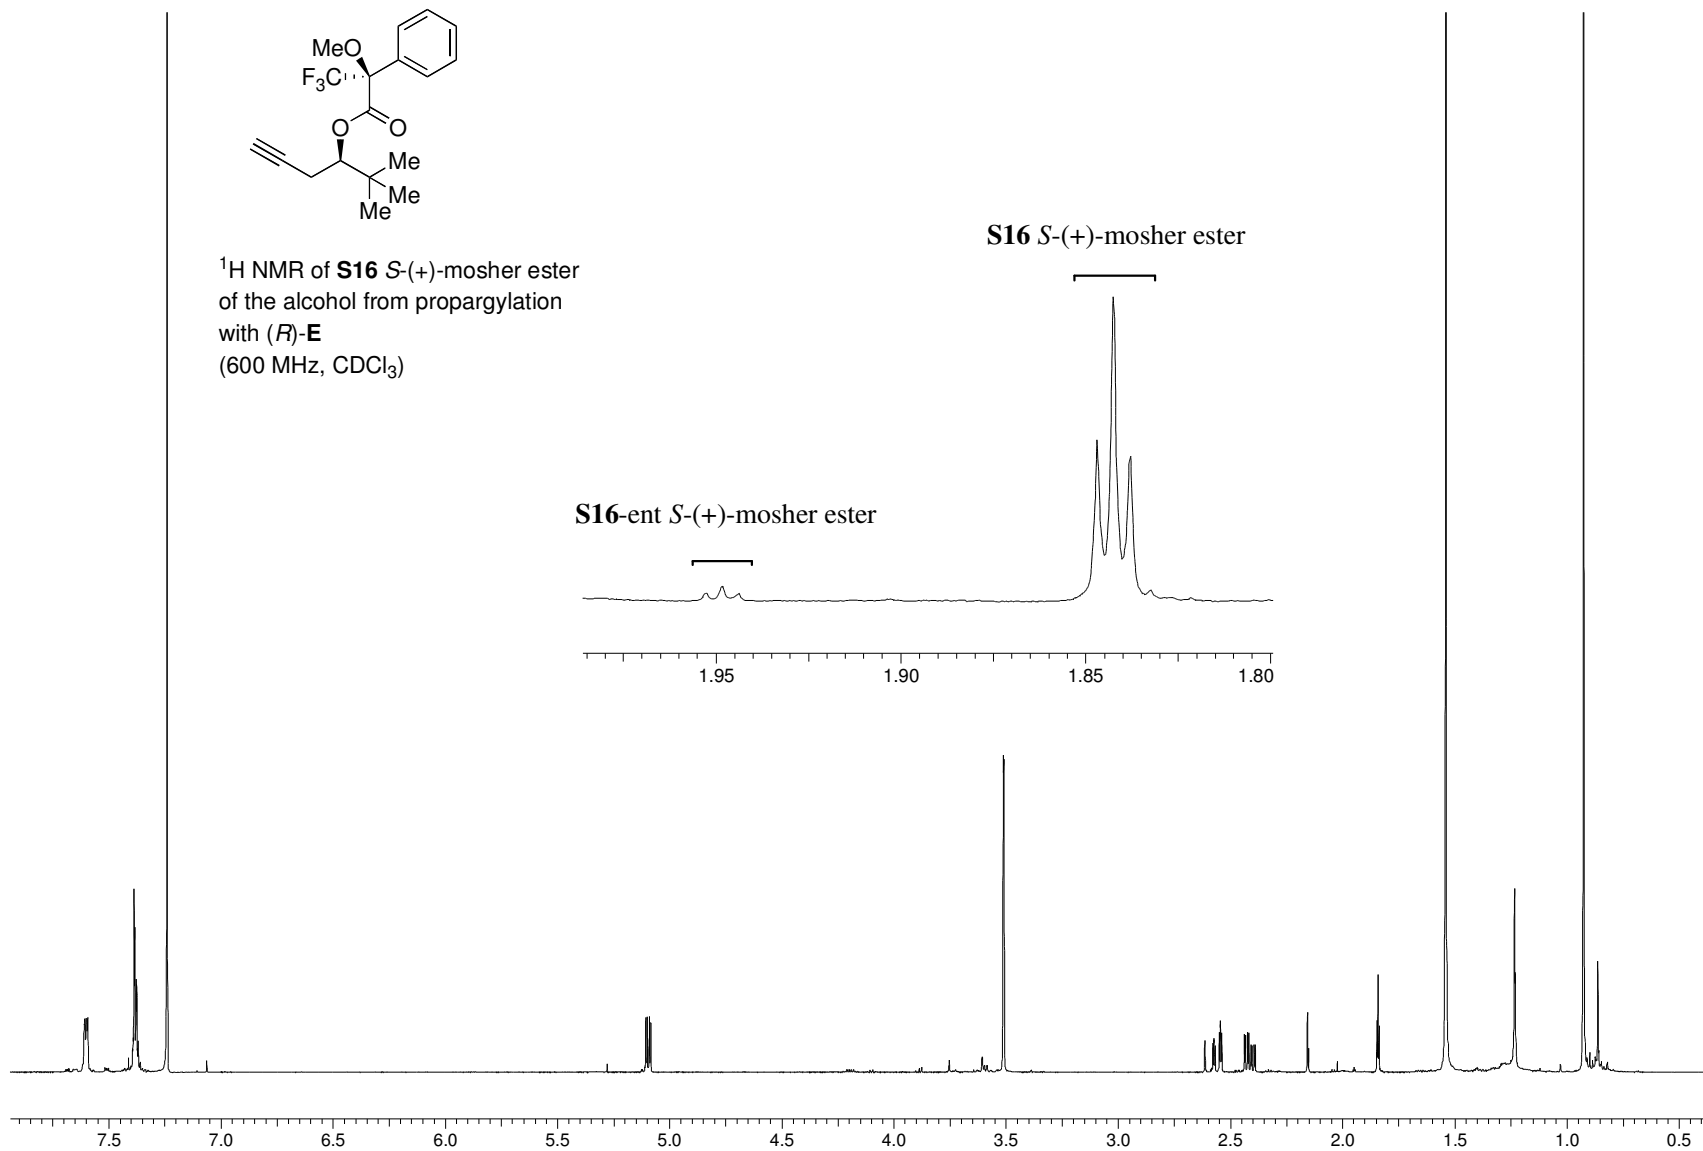

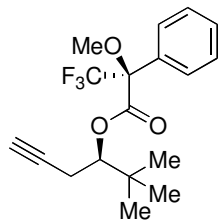

$^1\text{H}$  NMR of **S16** *S*-(+)-mosher ester  
of the alcohol from propargylation  
with (*R*)-**D**  
(600 MHz,  $\text{CDCl}_3$ )

**S16** *S*-(+)-mosher ester

**S16-ent** *S*-(+)-mosher ester

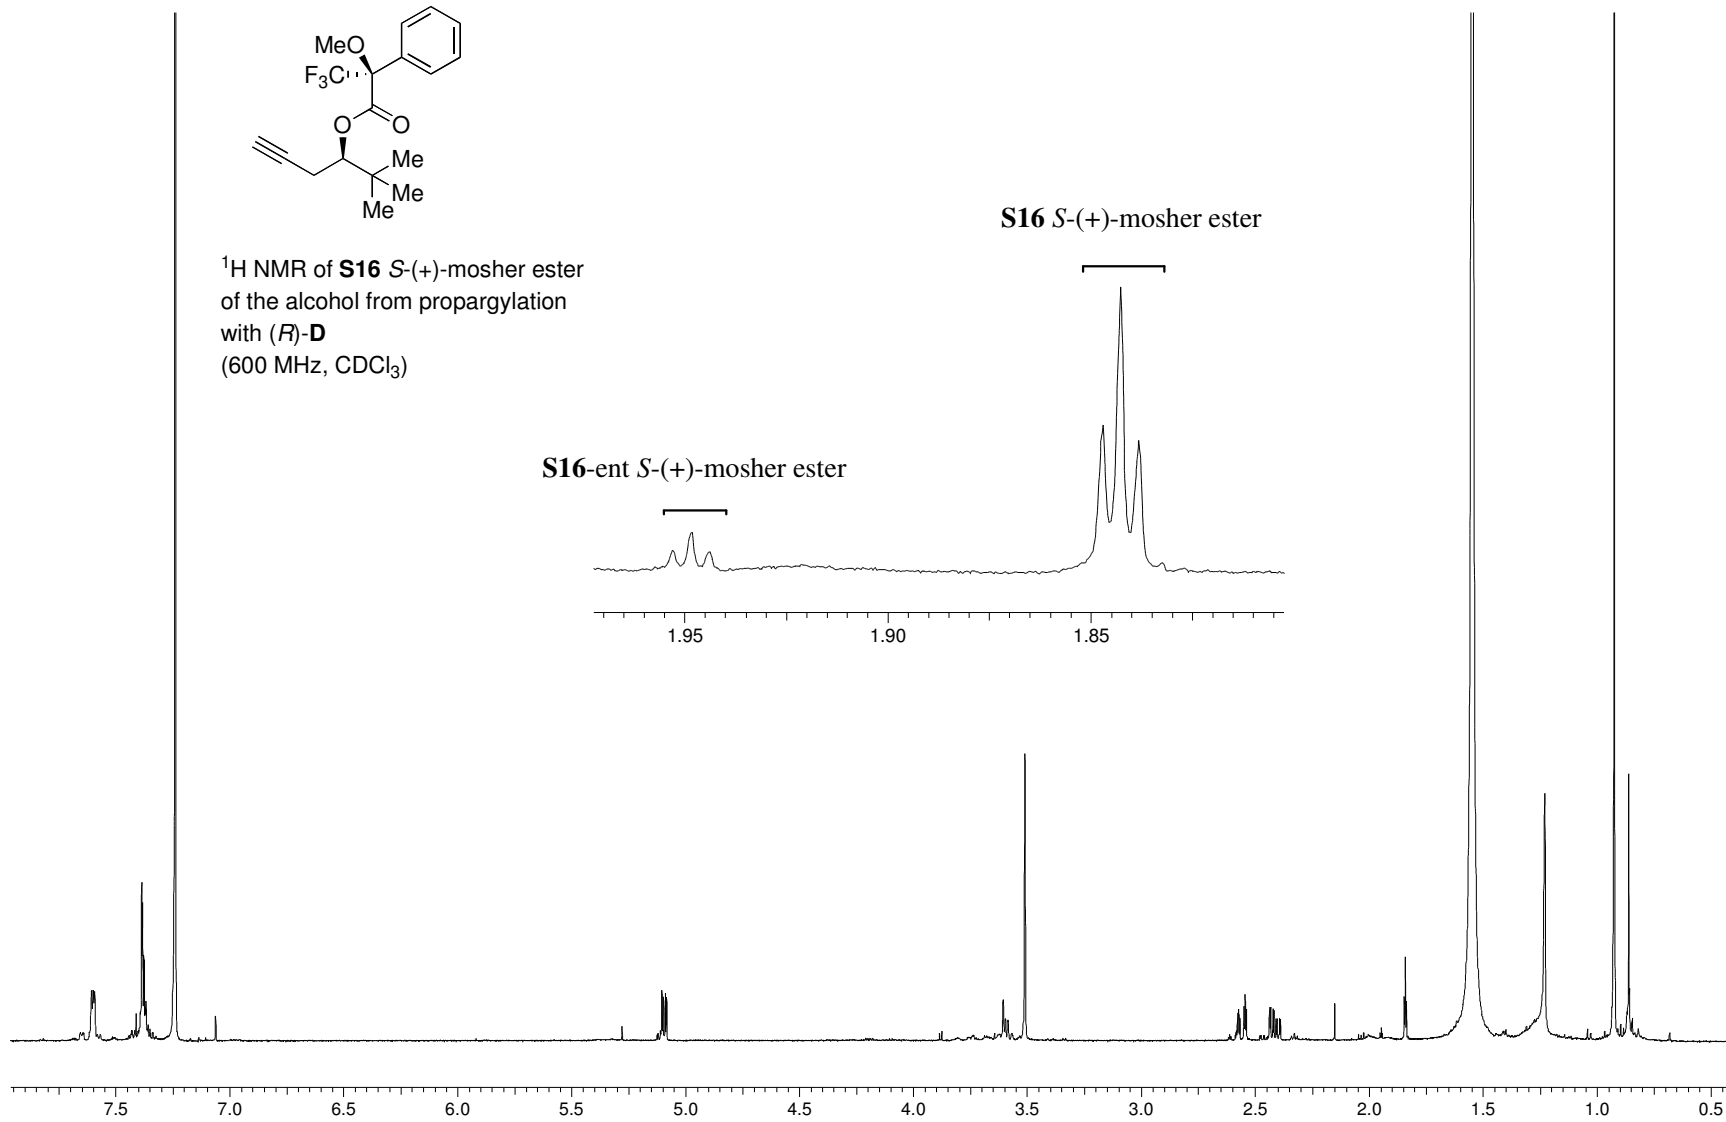



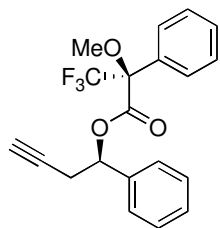

<sup>1</sup>H NMR of **S18** *S*-(+)-mosher ester  
of the alcohol from propargylation  
with (*R*)-**E**  
(600 MHz, CDCl<sub>3</sub>)

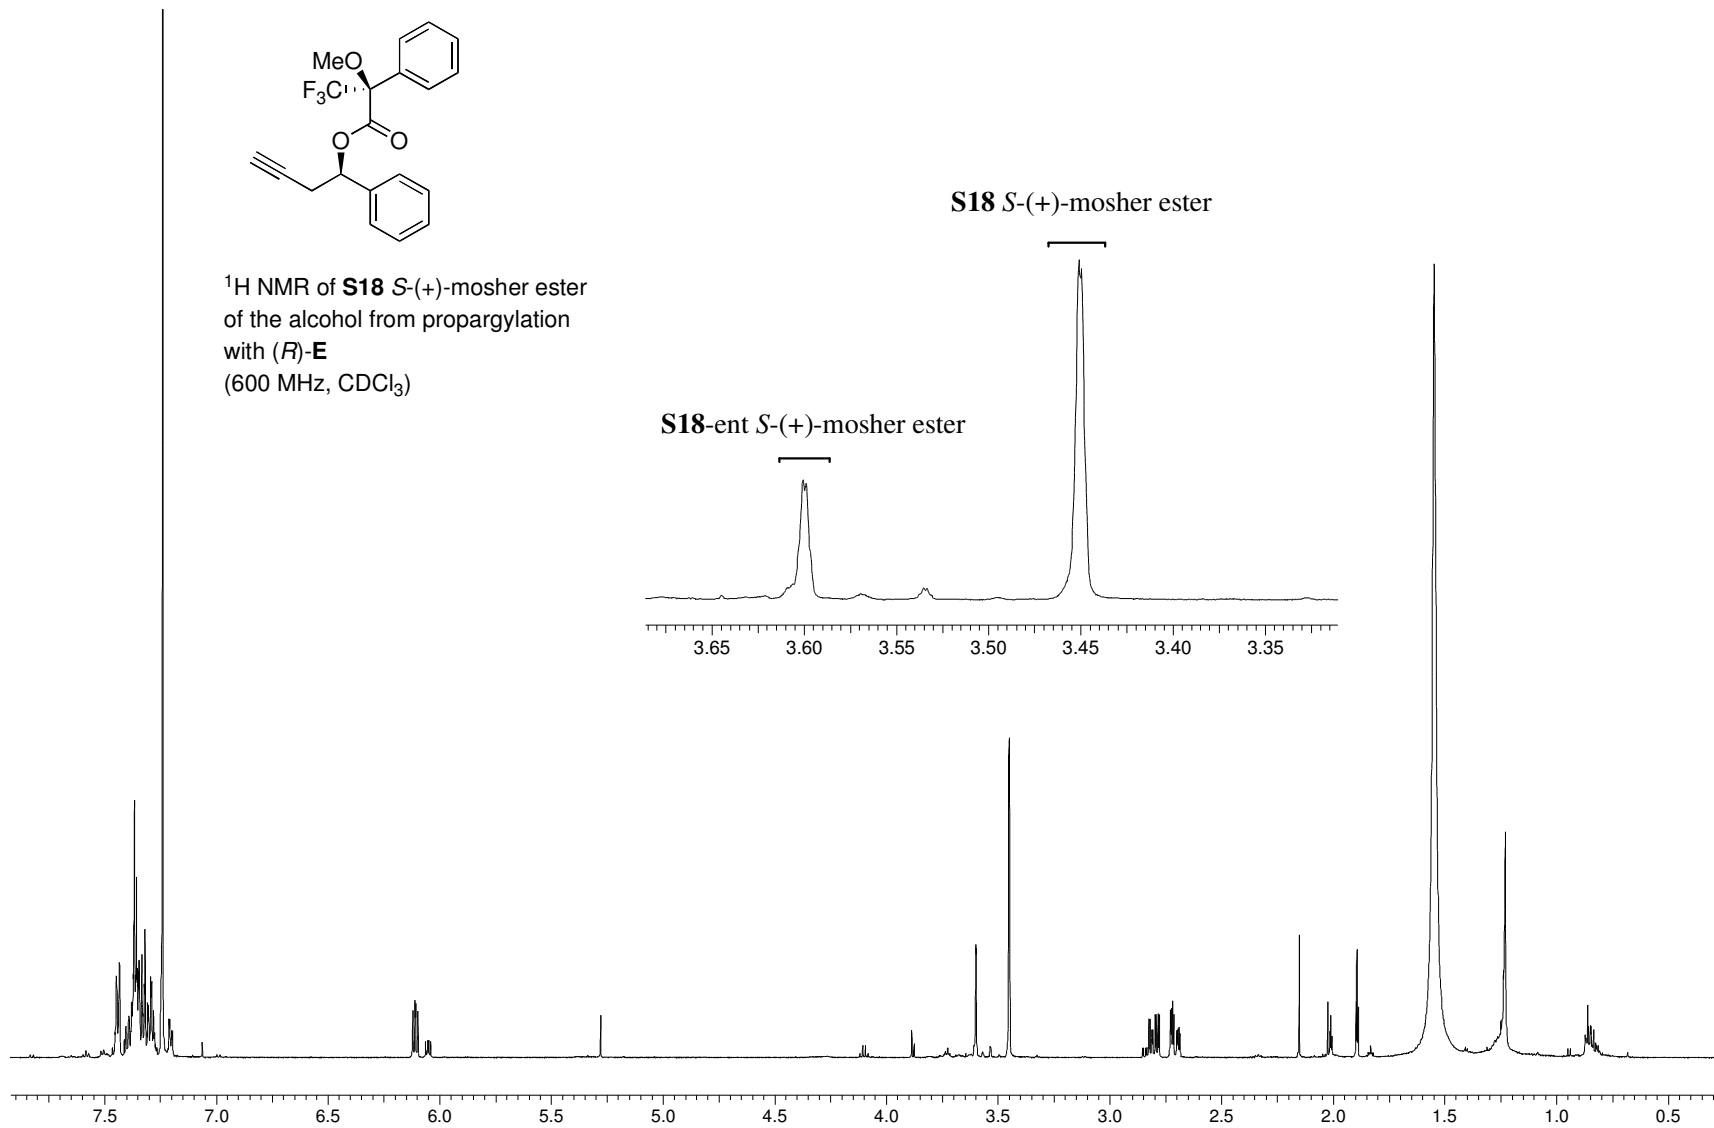

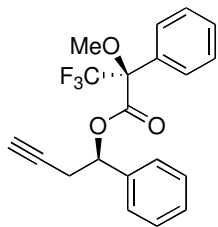

$^1\text{H}$  NMR of **S18** *S*-(+)-mosher ester  
of the alcohol from propargylation  
with (*R*)-**D**  
(600 MHz,  $\text{CDCl}_3$ )

**S18** *S*-(+)-mosher ester

**S18-ent** *S*-(+)-mosher ester

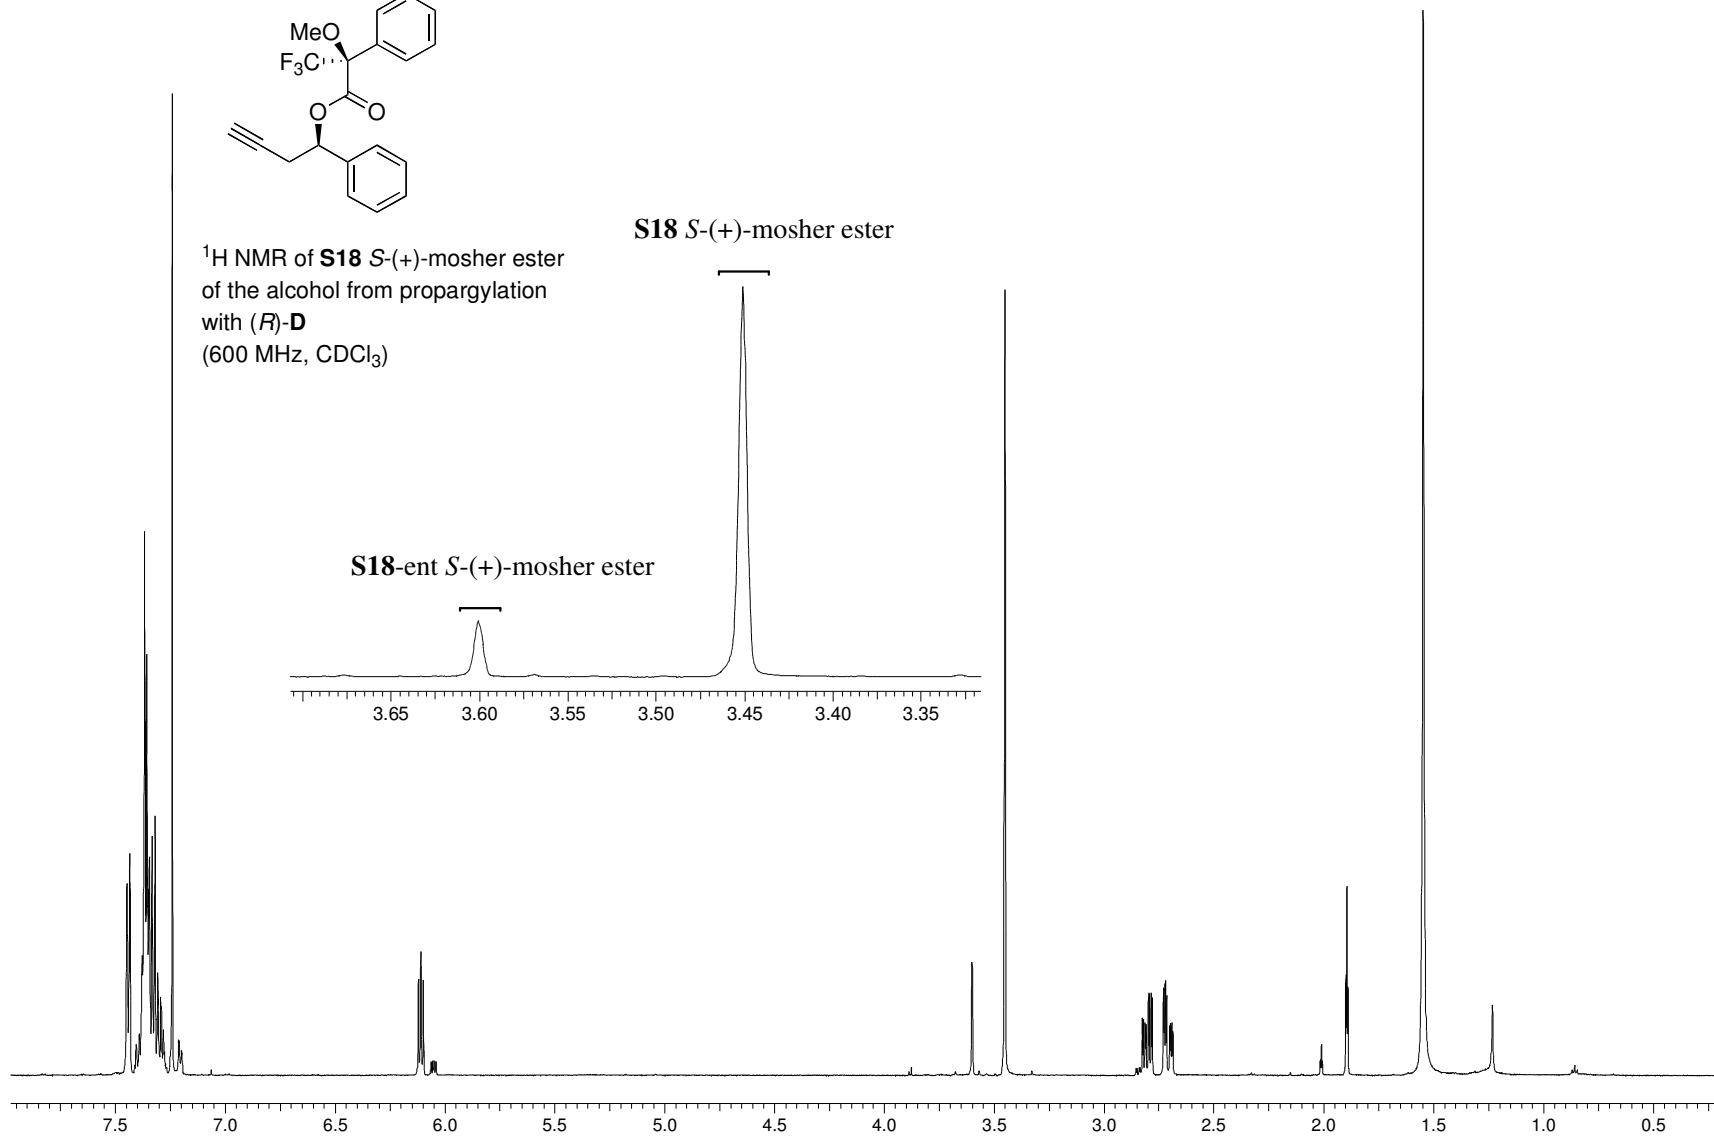

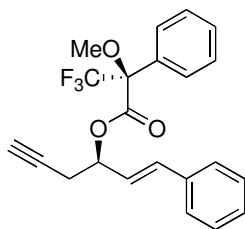

$^1\text{H}$  NMR of **S20** *S*-(+)-mosher ester  
of the alcohol from propargylation  
with (*R*)-**E**  
(600 MHz,  $\text{CDCl}_3$ )

**S20-ent** *S*-(+)-mosher ester

**S20** *S*-(+)-mosher ester

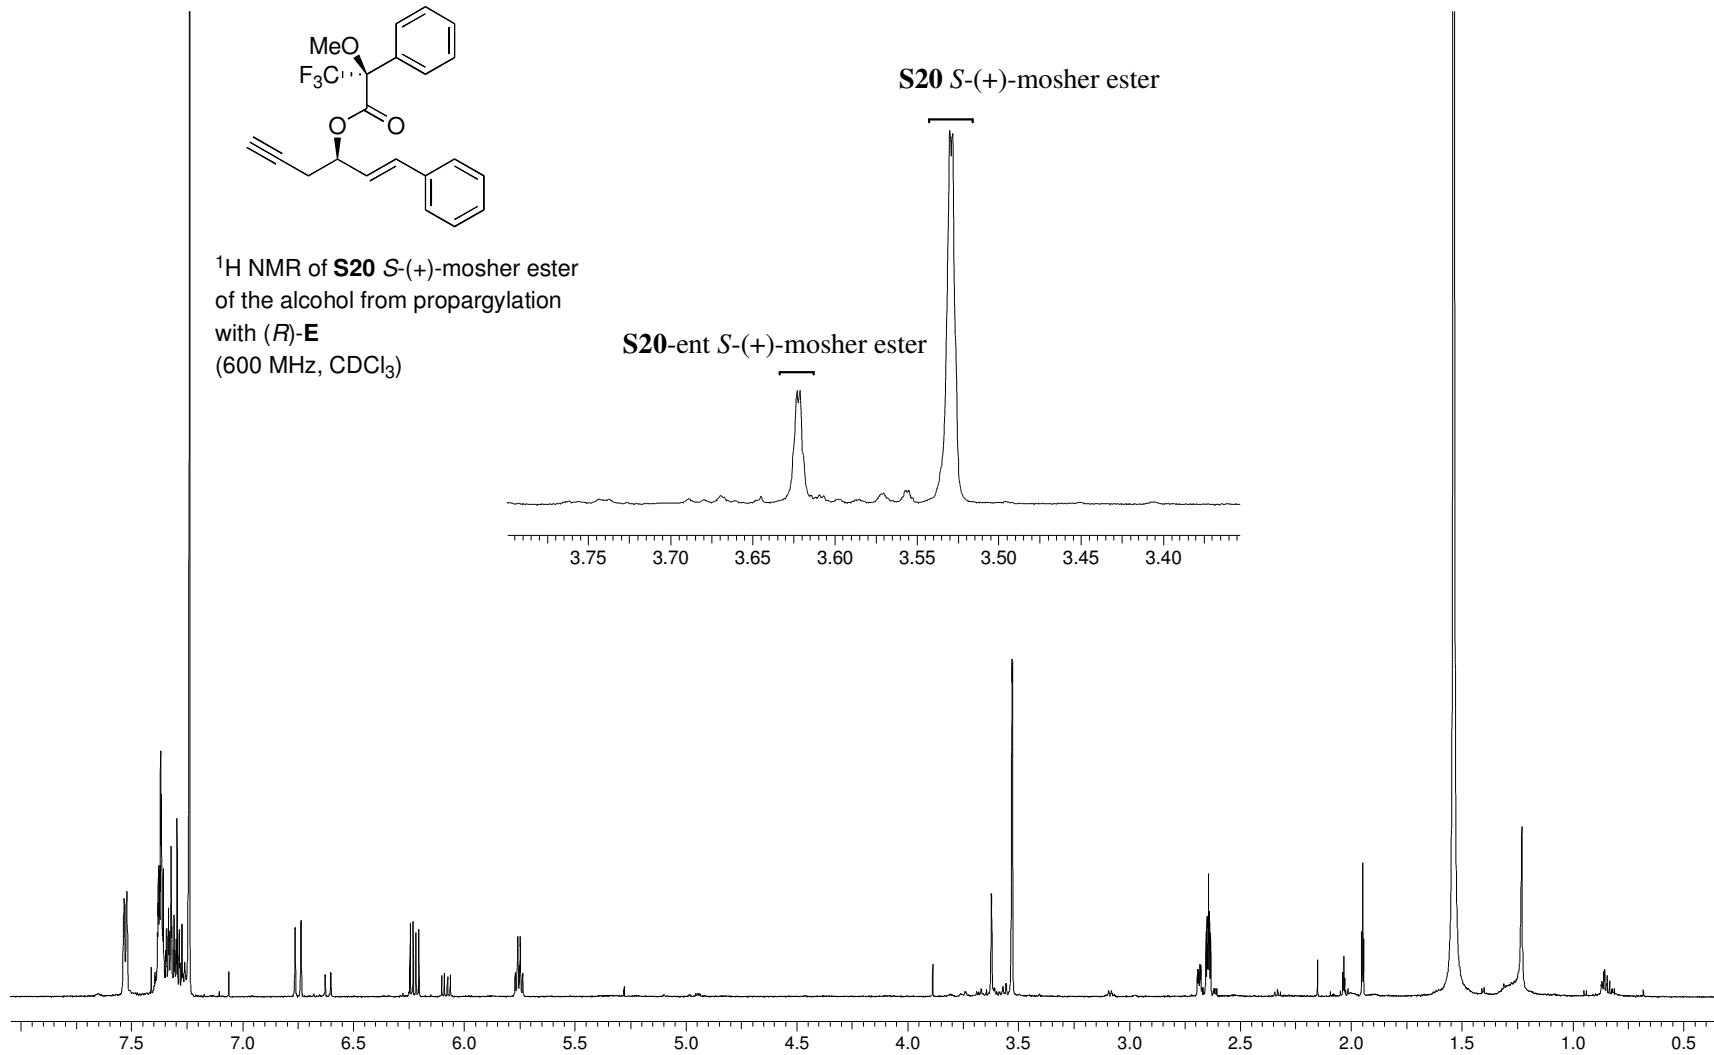

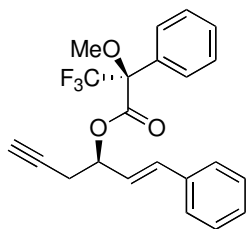

$^1\text{H}$  NMR of **S20** *S*(+)-mosher ester  
of the alcohol from propargylation  
with (*R*)-**D**  
(600 MHz,  $\text{CDCl}_3$ )

**S20** *S*(+)-mosher ester

**S20-ent** *S*(+)-mosher ester

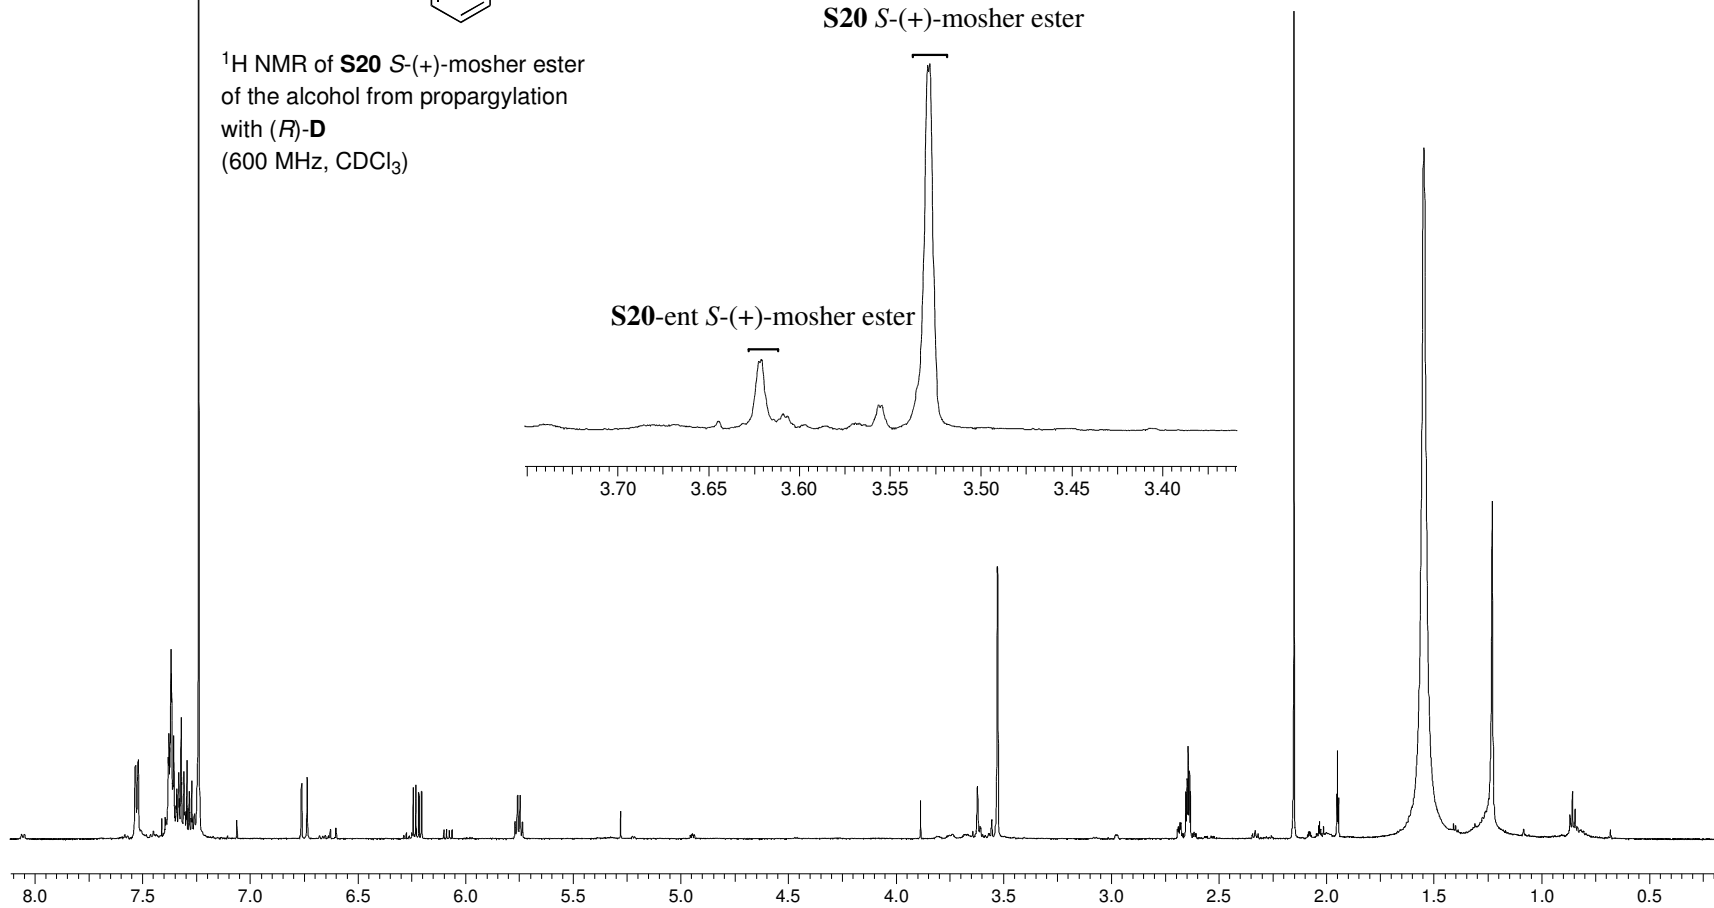



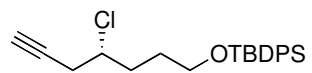

<sup>13</sup>C NMR of **9**  
(125 MHz, CDCl<sub>3</sub>)

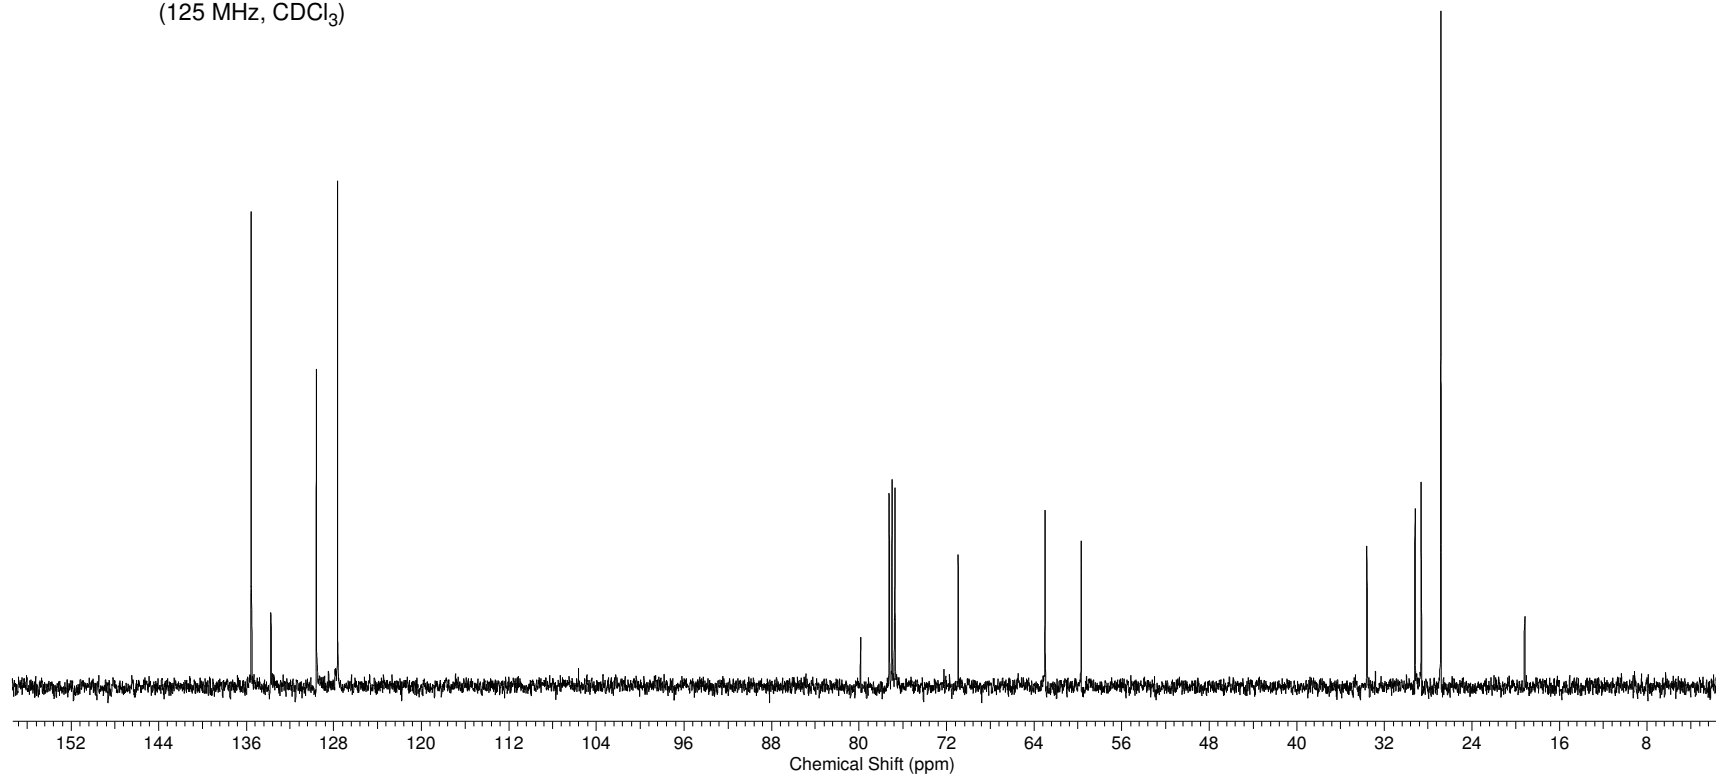

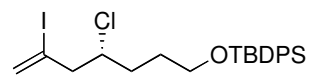

$^1\text{H}$  NMR of **1b**  
(500 MHz,  $\text{CDCl}_3$ )

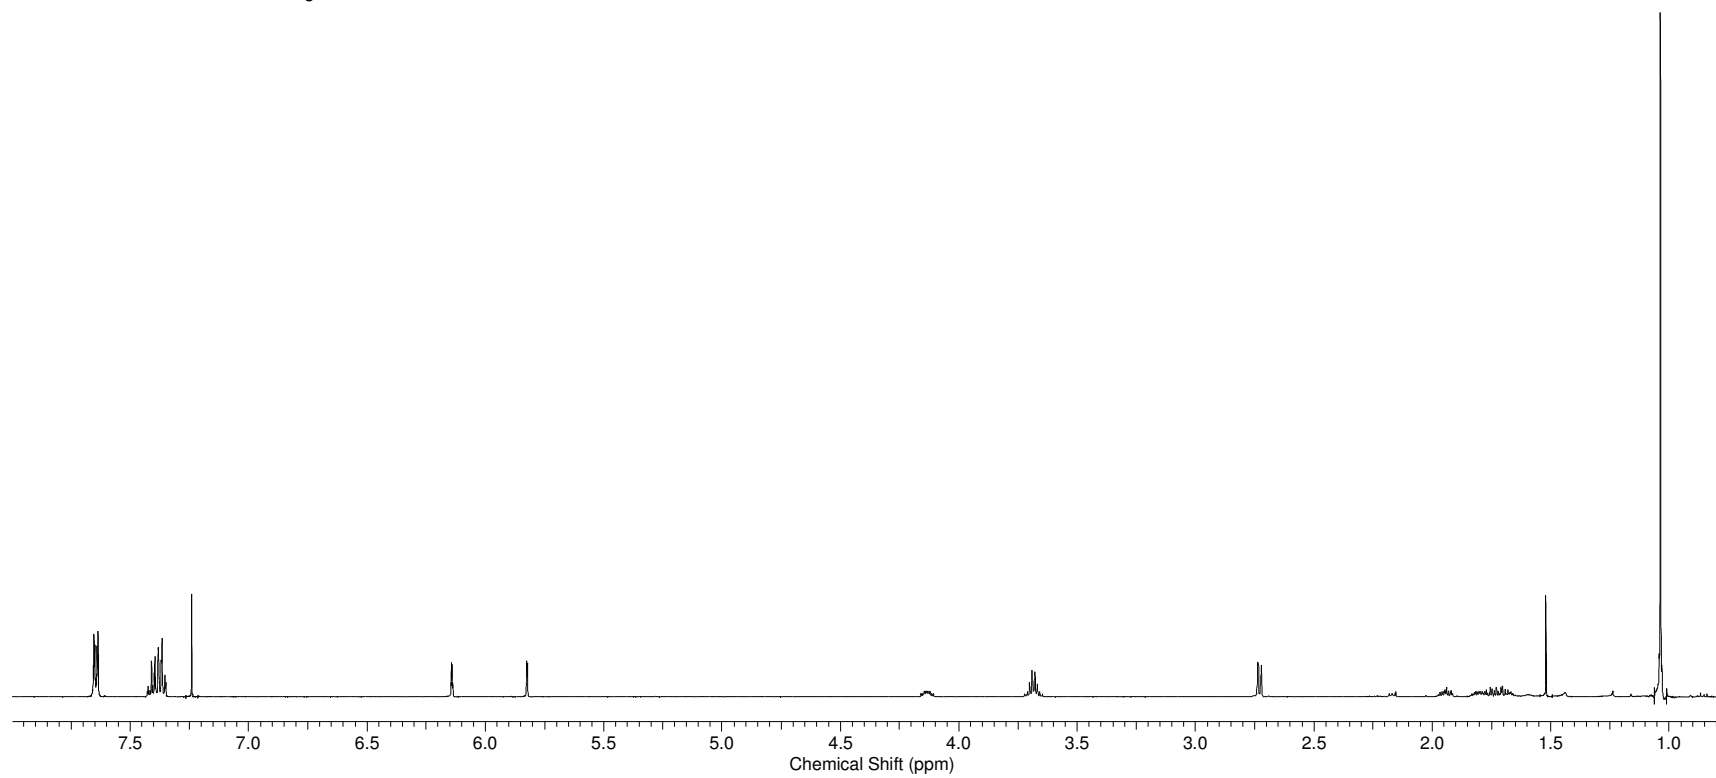

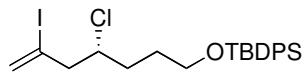

$^{13}\text{C}$  NMR of **1b**  
(125 MHz,  $\text{CDCl}_3$ )

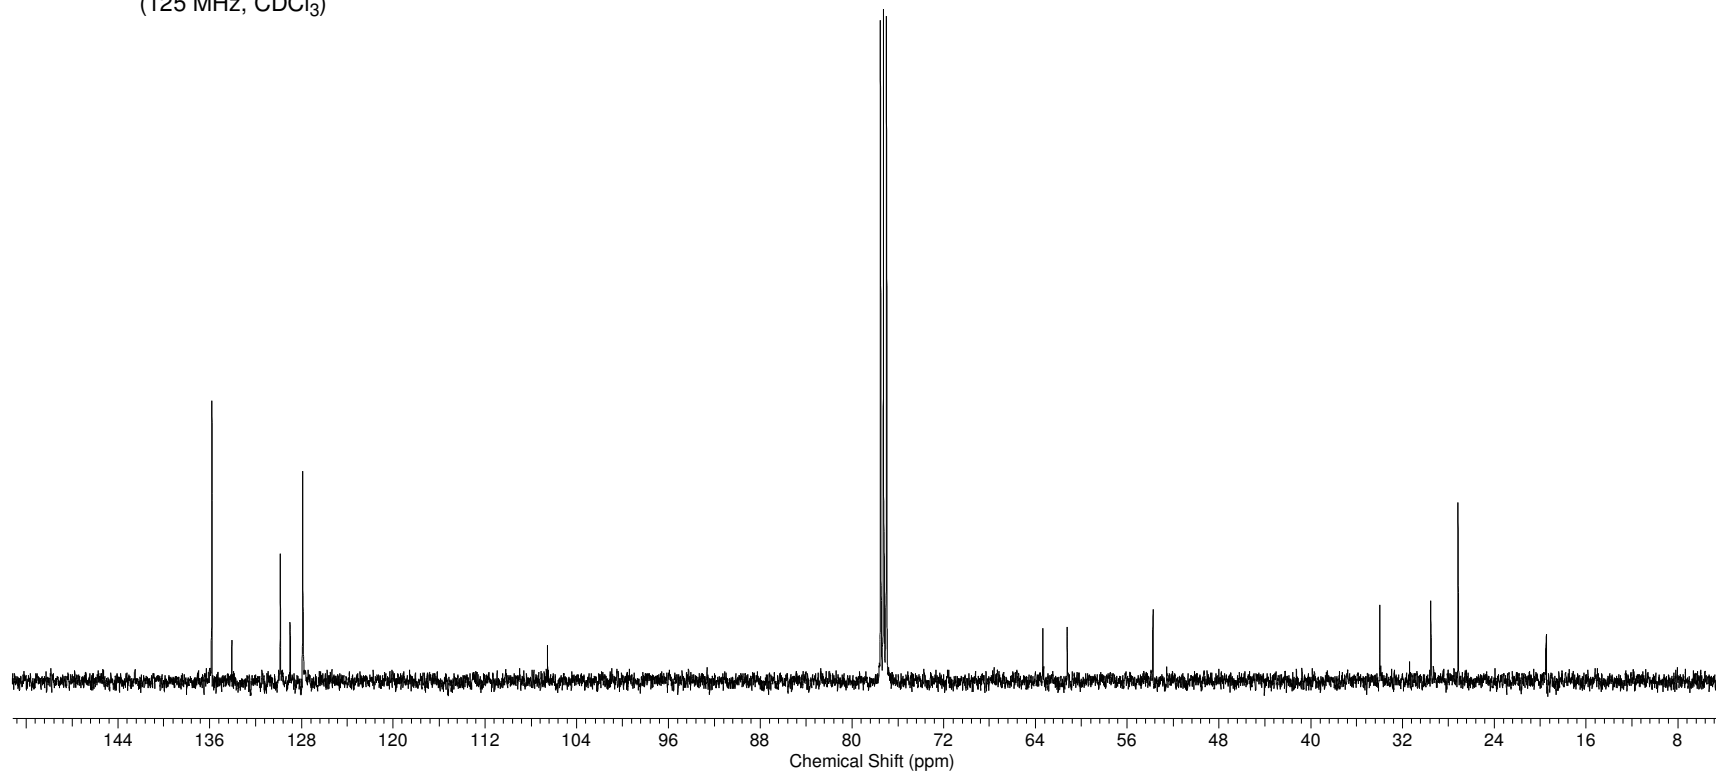



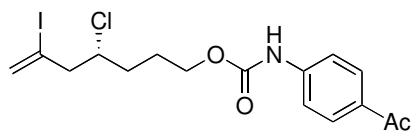

<sup>1</sup>H NMR of **iii**  
(500 MHz, CDCl<sub>3</sub>)

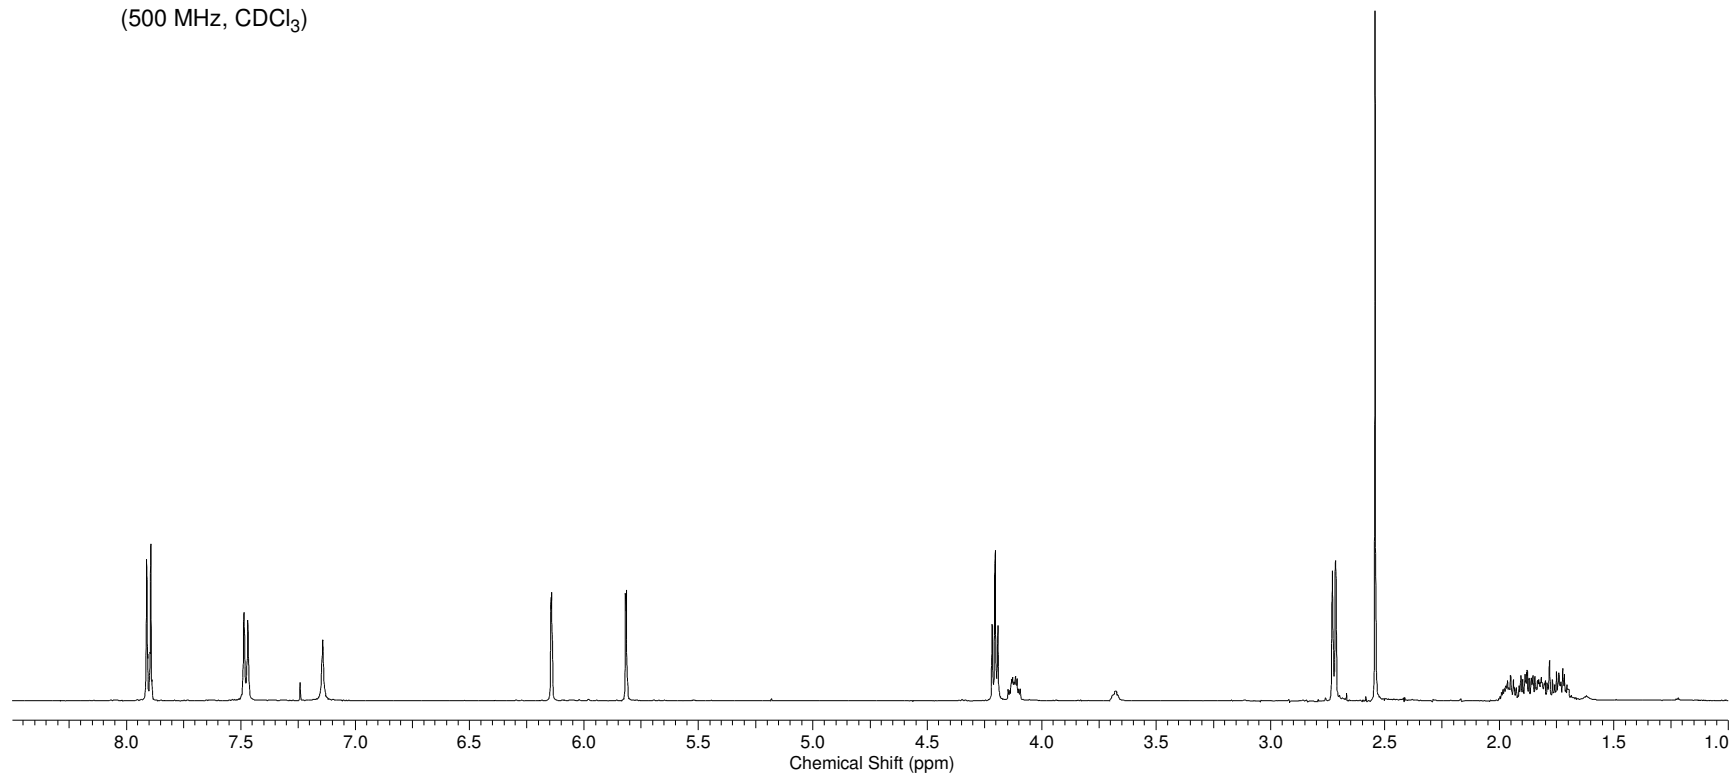

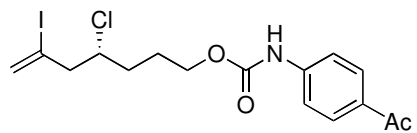

$^{13}\text{C}$  NMR of **iii**  
(125 MHz,  $\text{CDCl}_3$ )

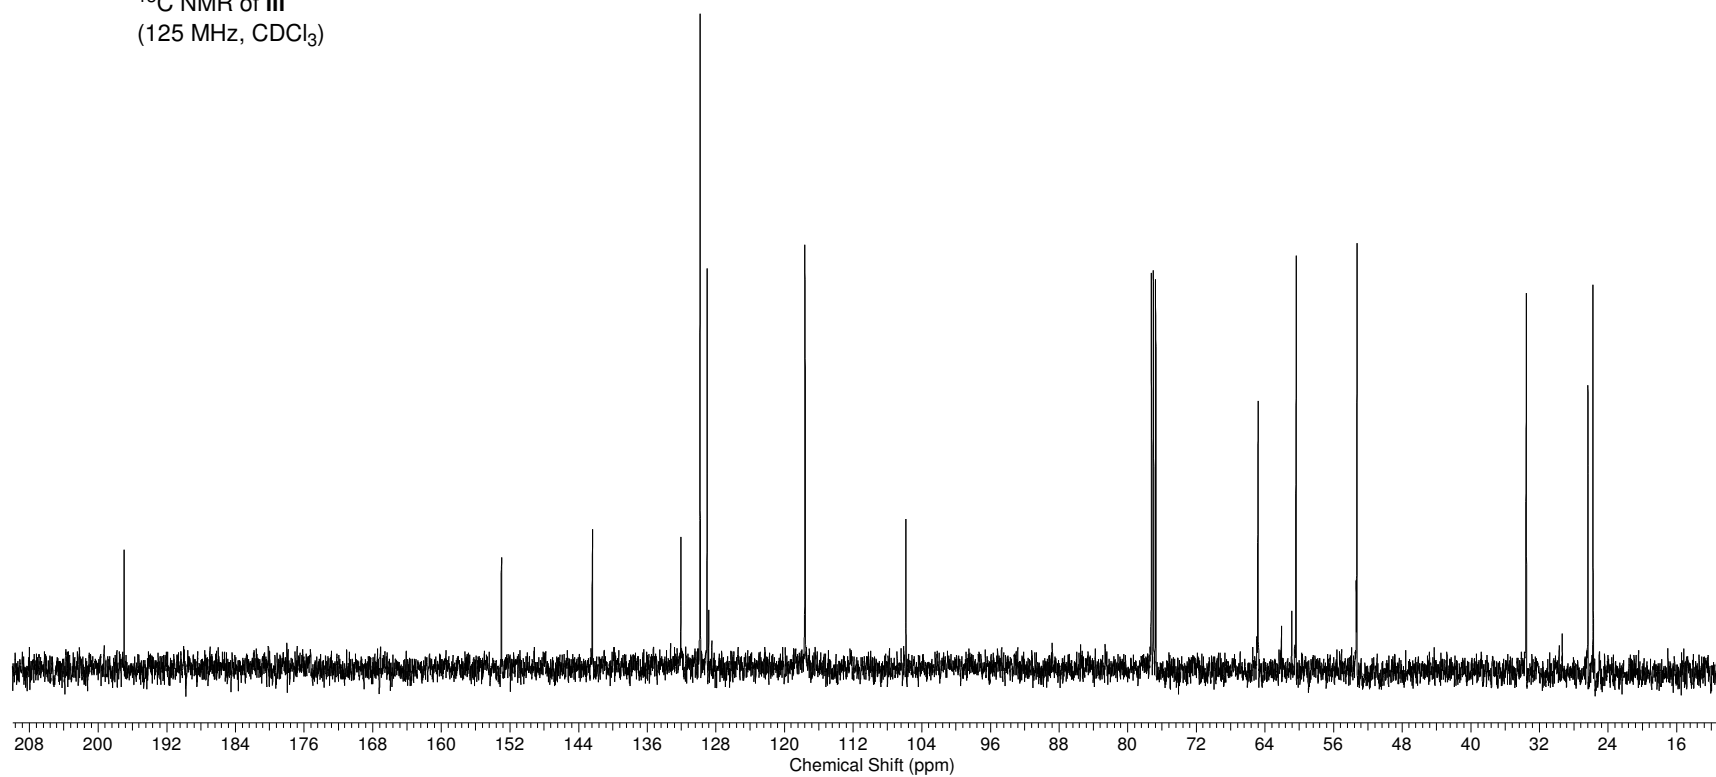

Supplement: NIHMS146276-supplement-2_si_002.pdf [file NIHMS146276-supplement-2_si_002.pdf]
